1 **Cryo-EM structure of the potassium-chloride cotransporter KCC4 in lipid nanodiscs**

2  
3

4 Michelle S. Reid<sup>1,2</sup>, David M. Kern<sup>1,2</sup> & Stephen G. Brohawn<sup>1,2</sup>

5  
6

7 Affiliations

8

9 <sup>1</sup>Department of Molecular & Cell Biology, University of California Berkeley, Berkeley, California  
10 94720, USA

11 <sup>2</sup>Helen Wills Neuroscience Institute, University of California Berkeley, Berkeley, California  
12 94720, USA

13 correspondence to [brohawn@berkeley.edu](mailto:brohawn@berkeley.edu)

14  
15

16

17 **Abstract**

18

19 Cation-chloride-cotransporters (CCCs) catalyze transport of Cl<sup>-</sup> with K<sup>+</sup> and/or Na<sup>+</sup> across  
20 cellular membranes. CCCs play roles in volume regulation, neural development and function,  
21 audition, blood pressure regulation, and renal function. CCCs are targets of drugs including loop  
22 diuretics and their disruption is implicated in pathophysiologies including epilepsy, hearing loss,  
23 and the genetic disorders Andermann, Gitelman, and Bartter syndromes. Here we present the  
24 cryo-EM structure of a CCC, the *Mus musculus* K<sup>+</sup>-Cl<sup>-</sup> cotransporter KCC4, in lipid nanodiscs.  
25 The structure, captured in an inside-open conformation, reveals the architecture of KCCs  
26 including an extracellular domain poised to regulate transport activity through an outer gate. We  
27 further identify substrate K<sup>+</sup> and Cl<sup>-</sup> binding sites and provide a structural explanation for  
28 differences in substrate specificity and transport ratio between CCCs. These results provide  
29 mechanistic insight into the function and regulation of a physiologically important transporter  
30 family.

## 31 Introduction

32  
33 CCCs in mammals include the potassium-chloride cotransporters KCC1-4, the sodium-  
34 potassium-chloride cotransporters NKCC1-2, the sodium-chloride cotransporter NCC, and  
35 CCC8-9 (Figure S1)<sup>1,2,3</sup>. First characterized as modulators of red blood cell volume<sup>4,5</sup>, CCCs are  
36 now appreciated to play critical roles in cellular volume regulation, modulation of neuronal  
37 excitability, renal function, auditory system function, transepithelial transport, and blood  
38 pressure regulation<sup>2,3,6</sup>. CCCs are targets of drugs including the thiazide and loop diuretics  
39 hydrochlorothiazide, furosemide, and bumetanide and their disruption is associated with  
40 congenital hydrocephaly, epilepsy, hearing loss, Andermann syndrome, Gitelman syndrome,  
41 and Bartter syndrome<sup>3,7,8</sup>.

42  
43 KCCs are important for K<sup>+</sup> and Cl<sup>-</sup> homeostasis, including in establishing low neuronal  
44 cytoplasmic Cl<sup>-</sup> concentrations critical for inhibitory neurotransmission, and in volume regulation  
45 in many cell types<sup>2,9-11</sup>. Among KCCs, KCC4 is most strongly activated by cell swelling and high  
46 internal [Cl<sup>-</sup>] and is uniquely active in acidic external environments<sup>2,9</sup>. KCC4 is expressed in  
47 tissues including the heart, nervous system, kidney, and inner ear and mice lacking KCC4  
48 display progressive deafness and renal tubular acidosis<sup>2,10,11,12</sup>. Hearing loss in these animals is  
49 due to disrupted K<sup>+</sup> recycling by Dieter's cells in the cochlea and hair cell excitotoxicity, while  
50 renal tubular acidosis is due to impaired Cl<sup>-</sup> recycling by  $\alpha$ -intercalated cells in the kidney distal  
51 nephron<sup>12</sup>.

52  
53 CCCs display varied substrate specificity and transport stoichiometry despite sharing a common  
54 amino acid-polyamine-organocation (APC) superfamily fold<sup>13-15</sup>. KCCs cotransport K<sup>+</sup>:Cl<sup>-</sup> in a 1:1  
55 ratio, NKCCs cotransport 1K<sup>+</sup>:1Na<sup>+</sup>:2Cl<sup>-</sup>, and NCCs cotransports 1Na<sup>+</sup>:1Cl<sup>-</sup><sup>2,3</sup>. One  
56 consequence of this difference is that under typical conditions (with [K<sup>+</sup>]<sub>in</sub>: [K<sup>+</sup>]<sub>out</sub> > [Cl<sup>-</sup>]<sub>out</sub>: [Cl<sup>-</sup>]<sub>in</sub>),  
57 transport by KCCs is outwardly directed while transport by NKCCs/NCCs is directed into cells<sup>2,3</sup>.  
58 CCCs have two distinctive elaborations on the APC fold. First, the scaffold is followed by a C-  
59 terminal domain (CTD) important for regulating expression, trafficking, and activity including  
60 through phosphorylation or dephosphorylation of CTD sites in response to cell swelling<sup>16,17,18,19</sup>.  
61 Second, CCCs contain a "long extracellular loop" with predicted disulfide bonds and  
62 glycosylation sites that differs in position and structure between CCCs; it is formed by the region  
63 between TM5-TM6 in KCCs and between TM7-TM8 in NKCCs<sup>14,20</sup>.

64  
65 KCCs are present as monomers and dimers in cells and modulation of quaternary state has  
66 been implicated in transporter regulation. A shift from monomeric to dimeric KCC2 during  
67 development coincides with an increase in transport activity that results in chloride extrusion  
68 from neurons (the excitatory-to-inhibitory GABA switch)<sup>21,22,23</sup>. Homodimerization is likely largely  
69 mediated through CTD interactions, as observed in the recent cryo-EM structure of NKCC1<sup>21</sup>  
70 and calpain-mediated proteolysis of the KCC2 CTD is associated with a decrease in transporter  
71 activity<sup>23</sup>. In addition to self-associating, KCCs heterodimerize with other CCCs and interact with  
72 other membrane proteins including ion channels<sup>22,24</sup>.

73  
74 Here we report the structure of *Mus musculus* KCC4 in lipid nanodiscs determined by cryo-EM.  
75 The structure reveals unique features of KCCs and, together with functional characterization of  
76 structure-based mutants, provides insight into the basis for ion substrate selectivity, transport  
77 stoichiometry, and regulation of activity in potassium-chloride cotransporters.

78  
79  
80  
81

## 82 **Results**

83

### 84 **Structure of KCC4 in lipid nanodiscs**

85

86 *Mus musculus* KCC4 was heterologously expressed in *Spodoptera frugiperda* (Sf9) insect cells  
87 for purification and structure determination (Figure S2,S3). To assess the activity of KCC4 in  
88 these cells, we utilized an assay that depends on the ability of KCCs to transport  $\text{TI}^+$  in addition  
89 to  $\text{K}^+$ <sup>25</sup>. In cells loaded with the  $\text{TI}^+$ -sensitive fluorophore FluxOR red,  $\text{TI}^+$  uptake from the  
90 extracellular solution results in an increase in fluorescence signal (Figure 1A). Cells infected  
91 with virus encoding KCC4, but not cells infected with a virus encoding an anion-selective  
92 volume-regulated ion channel SWELL1<sup>26</sup> or uninfected Sf9 cells, displayed increased  
93 fluorescence over time consistent with KCC4 activity (Figure 1B,C). No significant difference in  
94 activity was observed between N- and C-terminally GFP-tagged mouse KCC4 (Figure 1B,C), in  
95 contrast to a previous report for KCC2<sup>27</sup>, and C-terminally tagged KCC4 was used for  
96 subsequent study.

97

98 We reconstituted KCC4 into lipid nanodiscs in order to study the structure of the transporter in a  
99 native-like membrane environment. KCC4 was extracted, purified in detergent, and exchanged  
100 into nanodiscs formed by the membrane scaffold protein MSP1D1 and a mixture of  
101 phospholipids that approximates their representation in neuronal membranes (2:1:1 molar ratio  
102 DOPE:POPC:POPS (2-dioleoyl-sn-glycero-3-phosphoethanolamine:1-palmitoyl-2-oleoyl-sn-  
103 glycero-3-phosphocholine:1-palmitoyl-2-oleoyl-sn-glycero-3-phospho-L-serine)) (Figure S2)<sup>28,29</sup>.  
104 KCC4-MSP1D1 particles are similar in size and shape to KCC4 particles in detergent micelles  
105 by cryo-EM, but show improved distribution in thin ice which facilitated reconstruction to high  
106 resolution (Figure S4).

107

108 An unmasked reconstruction of KCC4 in nanodiscs shown in Figure 2A is contoured to highlight  
109 the position of the lipid membrane surrounding the transmembrane region of the transporter. To  
110 achieve the highest resolution reconstruction, the nanodisc density was subtracted and particles  
111 were subjected to focused classification and subsequent refinement (Figure S5). The resulting  
112 map, at 3.6 Å overall resolution, enabled complete de novo modeling of the transmembrane and  
113 extracellular region of KCC4 and includes two partial extracellular glycosylation sites, a bound  
114  $\text{K}^+$  ion, and a bound  $\text{Cl}^-$  ion (Figures 1C,1D,S6, and S7).

115

### 116 **Overall architecture**

117

118 KCC4 is monomeric in the nanodisc structure, in contrast to the recent homodimeric structure of  
119 *Danio rerio* NKCC1<sup>30</sup>. Density for the N-terminal region and C-terminal domain (CTD), which  
120 together comprise approximately half the expressed protein mass, is not observed in the cryo-  
121 EM maps (Figure 2, S1, and S2). The N-terminal region is weakly conserved, variable in length  
122 among CCCs (Figure S1), and is likewise unresolved in the structure of NKCC1<sup>30</sup>. We presume  
123 it is highly flexible in KCC4. The C-terminal domain, however, is well conserved, has  
124 documented roles in regulation, expression, and trafficking<sup>1,2,13,14,16</sup>, and mediates  
125 homodimerization of NKCC1 and the Archaeal CCC (MaCCC)<sup>30,31</sup>.

126

127 We evaluated possible explanations for the difference in oligomeric state between KCC4 and  
128 NKCC1. Proteolytic cleavage of the dimerization-mediating CTD was excluded because the  
129 CTD was identified by mass spectrometry of purified KCC4 with high coverage (47%) and  
130 abundance (81% of all KCC4 peptides) (Figure S3). Disruption of putative homodimers during  
131 purification or sample preparation was excluded for the following reasons: (i) The portion of  
132 KCC4 in an early-eluting broad peak from a sizing column (Figure S2A) displays nonspecific

133 aggregation by cryo-EM. (ii) KCC4 is monomeric before and after reconstitution in nanodiscs as  
134 assessed by cryo-EM (Figures S2,S4). (iii) Cross-linking of purified KCC4 was observed only at  
135 high concentrations of crosslinker (Figure S2F) and was reduced when KCC4 was first  
136 deglycosylated (Figure S2E,F), suggesting some cross-linking in glycosylated KCC4 is from  
137 intermolecular glycan-glycan or protein-glycan linkages rather than through transmembrane  
138 regions or CTDs<sup>21</sup>. We conclude that the CTD is flexibly attached to the transmembrane region.  
139 Consistently, we observe a progressive loss of detailed features and a decrease in local  
140 resolution in TM11 and TM12 that connect the CTD to the core transmembrane region (Figure  
141 S7B, S8). Some two-dimensional class averages show a blurred cytoplasmic feature around the  
142 position we expect the CTD to emerge (Figure S4), although attempts to classify distinct  
143 conformations of this feature were unsuccessful. We conclude that the monomeric structure  
144 reported here corresponds to full-length mouse KCC4 with intrinsically flexible and/or disordered  
145 terminal regions.

### 146 **Transporter conformation**

149 KCC4 adopts an inward-open conformation. The outer surface of the transporter is sealed from  
150 the extracellular solution, while a continuous cavity extends from the center of the  
151 transmembrane region to the cytoplasmic side (Figure 3). The transmembrane region consists  
152 of twelve helices (TM1-TM12) with TM1-TM5 related to TM6-TM10 through an inverted repeat.  
153 TM2 and TM11 in KCC4 are linked by a membrane buried disulfide bond between amino acids  
154 C163 (TM2) and C626 (TM11) that are conserved among KCCs (Figure S1).

156 A prominent feature of KCC4 is a large extracellular domain, unique among proteins of known  
157 structure, extending ~35 Å above the membrane. It is formed by EL3 (the long extracellular  
158 loop<sup>20</sup>) and EL4, which pack together and cover approximately two-thirds of the transporter  
159 outer surface (Figure 2C-D, 3A). Sequence comparison suggests this domain is conserved in all  
160 KCCs and is not found in other CCCs (Figure S1). The structure consists of a short three-  
161 stranded antiparallel beta sheet (EL4 S1-3), five short helices (EL3 HA-C and EL4 HA,B), and  
162 regions without regular secondary structure. It is stabilized by two disulfide bonds (C308-C323  
163 and C343-C352)<sup>20</sup> and decorated with N-linked glycosylation sites<sup>2,32</sup> conserved among KCCs.  
164 Non-protein density consistent with glycosylation is present at four previously identified sites  
165 (N312, N331, N344, and N360)<sup>32</sup> and we model partial carbohydrate chains at the two stronger  
166 sites (N312 and N360). Notably, the carbohydrate chain at N312 projects from the EH3 S1-S2  
167 loop underneath an extended segment that leads to TM6A. This arrangement may stabilize the  
168 extracellular domain and couple it to movements in TM6A, which moves between functional  
169 states in other APC transporters<sup>15,33</sup>. This structural role for glycosylation may explain the  
170 functional defects associated with non-glycosylated mutants of KCC4<sup>32</sup>.

172 The position of the extracellular domain suggests its involvement in conformational changes  
173 during the KCC transport cycle. A segment of the extracellular domain close to the membrane  
174 forms part of the constriction that seals the internal vestibule from the extracellular solution. This  
175 is likely the extracellular gate based on comparison to other APC transporters (Figure 3A,B)<sup>15</sup>.  
176 In KCC4, residues in EL4, TM1, TM3, and TM10 form an electrostatic and hydrophobic  
177 interaction network that seals the gate (Figure 3A,B). R140 on TM1B extends towards the  
178 extracellular solution to interact with D575 on TM10 and E222 on TM3. The extracellular domain  
179 is positioned immediately above through an interaction between K485 on EL4 and D575. The  
180 outer portion of TM1B contributes W143 which, together with F486, surrounds K485 as it  
181 projects towards TM10. This is reminiscent of the extracellular gate in LeuT formed by an  
182 electrostatic interaction between TM1 and TM10 (R30 and D404) and capped by EL4 through  
183 an interaction with TM10 (D401 and A319)<sup>34</sup>. By analogy, opening of the KCC4 extracellular

184 gate is likely to require “unzipping” the electrostatic network and rotation of EL4 and the  
185 extracellular domain away from the surface of the transmembrane region<sup>34,35</sup>.

186  
187 On the intracellular side of KCC4, a hydrophilic cavity is formed by TM1, TM3, TM6, and TM8  
188 that exposes the inside of the transporter to the cytoplasm (Figure 3C-E). At the top of this  
189 cavity are Cl<sup>-</sup> and K<sup>+</sup> binding sites. The cavity forms a bifurcated pathway for ion access to these  
190 sites, splitting into two routes approximately halfway through the tunnel due to the position of  
191 side chains of N439, R440, and R528. Both sides are open to an essentially equivalent degree  
192 (Figure 3D). The only constriction outside of the local area surrounding the ions is formed at the  
193 position of N439 (from TM6B), G525, and L529 (from TM8) where the cavity narrows to ~3.6 Å  
194 in diameter, which is still sufficiently large for passage of K<sup>+</sup> and Cl<sup>-</sup> ions. Within ~3 Å of each  
195 ion, the cavity narrows such that it would require at least partial ion dehydration.

196  
197 The cavity surface is markedly electropositive (Figure 3E). From the intracellular solution up to  
198 the position of the Cl<sup>-</sup>, charged and polar side chains (from R440, R528, R535, N131, N274,  
199 N439, and N521), backbone amides (from IL1), and a helical dipole (from TM6B) contribute  
200 electropositive character. Since intracellular Cl<sup>-</sup> ions are typically present at lower  
201 concentrations than K<sup>+</sup> ions, this may serve to favor accumulation of the less abundant  
202 substrate near its binding site within transporter. Above the Cl<sup>-</sup> site and around the K<sup>+</sup> site, the  
203 accessible surface becomes electronegative and would favor cation binding. The extracellular  
204 surface of the transporter outside of the sealed gate is markedly electronegative. How this  
205 relates to ion binding or release in outward-open states awaits additional structural information.

## 206 207 **Substrate ion binding sites**

208  
209 The central discontinuities in TM1 and TM6 result in protein backbone carbonyls and amides not  
210 involved in regular hydrogen bonding that are utilized for substrate binding in other APC  
211 transporters<sup>15</sup>. Around this region, we observe two prominent non-protein density features  
212 (Figure 4 A,D). Based on structural, functional, and comparative analyses described below, we  
213 model these sites as bound K<sup>+</sup> and Cl<sup>-</sup> ions.

214  
215 The stronger of the two densities between TM1, TM6, and TM3 is modeled as a K<sup>+</sup> ion. It is  
216 surrounded by electronegative groups contributed by backbone carbonyls (N131 and I132 in  
217 TM1 and P429 and T432 in TM6) and a tyrosine hydroxyl from Y216 in TM3. The distances  
218 between electronegative groups and the ion are consistent with K<sup>+</sup> binding (2.8 – 2.9 Å). The  
219 electronegative helix dipoles created by TM1A and TM6A may additionally contribute to a  
220 favorable electrostatic environment for cation binding. The coordinating tyrosine is conserved in  
221 all CCC family members that transport K<sup>+</sup>. In NCC, the position corresponding to Y216 is  
222 substituted by a histidine, which likely explains its K<sup>+</sup>-independence (Figure S1).

223  
224 The second site, between TM6 and TM10, is modeled as a Cl<sup>-</sup> ion. It is surrounded by  
225 electropositive groups from backbone amides (G433 and I434 in TM6) and a tyrosine hydroxyl  
226 from Y589 in TM10. The electropositive helix dipoles created by TM1B and TM6B may  
227 additionally stabilize anion binding. The interaction distances and coordination environment are  
228 reminiscent of Cl<sup>-</sup> sites in CLC transporters<sup>36</sup> and the coordinating tyrosine is conserved across  
229 CCCs.

230  
231 To validate the assignment of the K<sup>+</sup> and Cl<sup>-</sup> sites and test the importance of coordinating  
232 residues in transporter activity, we mutated Y216 and Y589 that contribute to the binding sites  
233 and assessed transporter activity. Mutations at both sites resulted in a marked reduction in  
234 transport activity in the TI<sup>+</sup>-flux assay: mutation of the K<sup>+</sup>-coordinating Y216 to alanine resulted

235 in a 44% reduction in activity and mutation of the Cl<sup>-</sup>-coordinating Y589 to phenylalanine  
236 resulted in an 85% reduction in activity compared to wild-type KCC4. We conclude these two  
237 sites are critical for KCC4 activity.

238  
239 How does substrate binding in the 1:1 K<sup>+</sup>:Cl<sup>-</sup> cotransporter KCC4 differ from the 1:1:2 Na<sup>+</sup>:K<sup>+</sup>:Cl<sup>-</sup>  
240 cotransporter NKCC1<sup>30,37</sup>? Overlays of the relevant sites are shown in Figure 4B,C,E. The  
241 KCC4 K<sup>+</sup> and Cl<sup>-</sup> sites correspond closely to sites for the same ions in NKCC1. However, the  
242 proposed Na<sup>+</sup> site in NKCC1 is dramatically reorganized in KCC4. In KCC4, TM8 is rotated  
243 farther away from TM1 and two consecutive Na<sup>+</sup>-coordinating serines in NKCC1 (conserved in  
244 all Na<sup>+</sup>-transporting CCCs) are substituted by glycine and alanine in KCC4 (and in KCC1-3)  
245 (Figure S1). The consequence is a loss of three of the five Na<sup>+</sup>-coordinating positions, providing  
246 a structural explanation for Na<sup>+</sup>-independence in KCCs. A second Cl<sup>-</sup> site in NKCCs  
247 extracellular to the K<sup>+</sup> site is structurally conserved in KCC4, but we do not observe evidence for  
248 ion occupancy at this site in the structure, suggesting it may be lost in KCC4 in conjunction with  
249 the Na<sup>+</sup>-site (Figure 4G).

250

## 251 **Discussion**

252

253 The structure of monomeric KCC4 in lipid nanodiscs is consistent with evidence for KCC  
254 monomers in cells in addition to homodimers and other oligomers<sup>22,23,38</sup>. Comparison of residues  
255 in KCC4 that correspond to those in the NKCC1 homodimerization interface<sup>30</sup> suggest KCC4  
256 could similarly self-interact. An intriguing hypothesis is that monomeric and dimeric KCC4 are  
257 functionally distinct and modulated differently; monomers may function independently of flexibly  
258 attached CTDs, while dimerization, which involves close juxtaposition of CTDs and  
259 transmembrane regions in NKCC1, could enable regulation of transporter activity through CTD  
260 posttranslational modifications<sup>14,22,23,38</sup>. Consistent with this notion, a monomeric to dimeric  
261 transition in KCC2 has been correlated with an increase in transporter activity<sup>22</sup> and can be  
262 regulated by phosphorylation of the CTD<sup>38</sup>, while proteolytic cleavage of the KCC2 CTD  
263 correlates with a decrease in activity<sup>23</sup>. Alternatively, the ability of KCC4 to hetero-oligomerize  
264 with other CCCs and other membrane proteins may be associated with weaker self-  
265 interaction<sup>24,39-41</sup>.

266

267 The structure of KCC4 provides insight into the architecture of KCCs and the mechanistic basis  
268 for coupled K<sup>+</sup>:Cl<sup>-</sup> transport. KCC4 is observed in an inside-open conformation that exposes the  
269 inside of the transporter to the cytoplasm through a wide and electropositive tunnel that may  
270 serve to concentrate the less abundant intracellular substrate Cl<sup>-</sup>. This conformation is similar to  
271 that observed in NKCC1 and presumably represents the lowest energy state for both CCCs in  
272 symmetrical salt concentrations in the absence of a transmembrane electrical gradient<sup>30</sup>. We  
273 identify K<sup>+</sup> and Cl<sup>-</sup> ions around central discontinuities in TM1 and TM6. A Na<sup>+</sup> site in the 1:1:2  
274 Na<sup>+</sup>:K<sup>+</sup>:Cl<sup>-</sup> cotransporter NKCC1 is reorganized in KCC4 due to TM-TM displacement and loss  
275 of specific coordinating side chains, explaining Na<sup>+</sup>-independence in KCCs. A second Cl<sup>-</sup> site in  
276 NKCC1 is unoccupied in KCC4, despite being structurally conserved, suggesting coupled  
277 binding of Na<sup>+</sup>:Cl<sup>-</sup> to these sites in NKCC1 and their coincident loss in KCCs.

278

## 279 **Methods**

280

### 281 **Cloning and Protein Expression**

282

283 Cloning, expression, and purification were performed similarly to that described for LRRC8A<sup>26</sup>.

284 The sequence for KCC4 from *Mus musculus* was codon optimized for *Spodoptera frugiperda*

285 and synthesized (Gen9, Cambridge, MA). The sequence was cloned into a custom vector based

286 on the pACEBAC1 backbone (MultiBac; Geneva Biotech, Geneva, Switzerland) with an added  
287 C-terminal PreScission protease (PPX) cleavage site, linker sequence, superfolder GFP  
288 (sfGFP), and 7xHis tag, generating a construct for expression of mmKCC4-SNS-LEVLFGQP-  
289 SRGGSGAAAGSGSGS-sfGFP-GSS-7xHis. Mutations were introduced using standard PCR  
290 techniques with partially overlapping primers. MultiBac cells were used to generate bacmids  
291 according to manufacturer's instructions. *Spodoptera frugiperda* (Sf9) cells were cultured in ESF  
292 921 medium (Expression Systems, Davis, CA) and P1 virus was generated from cells  
293 transfected with Escort IV Transfection Reagent (Sigma, Carlsbad, CA) according to  
294 manufacturer's instructions. P2 virus was generated by infecting cells at  $2 \times 10^6$  cells/mL with P1  
295 virus at a MOI  $\sim 0.1$ . Infection monitored by fluorescence of sfGFP-tagged protein and P2 virus  
296 was harvested at 72 hours post infection. P3 virus was generated in a similar manner to expand  
297 the viral stock. The P3 viral stock was then used to infect 1 L of Sf9 cells at  $4 \times 10^6$  cells/mL at a  
298 MOI  $\sim 2-5$ . At 60 hours post-infection, cells were harvested by centrifugation at 2500 x g and  
299 frozen at  $-80^\circ\text{C}$ .

300

### 301 **Transporter Assay**

302

303 The FluxOR-Red Potassium Ion Channel Assay (Thermo Fisher Scientific) was adapted for  
304 transport assays in Sf9 insect cells by adjusting the osmolarity of all buffers to 380 mOsm (by  
305 addition of sodium methylsulfonate). Cells were infected at a density of  $1.5 \times 10^6$  cells/ml and  
306 grown in suspension for 60-72 hours for robust KCC4-GFP expression.  $100 \mu\text{L}$  of cells at  $1 \times 10^6$   
307 cells/ml were plated and allowed to adhere for 1 hour before the assay. Growth media was  
308 replaced with 1X Loading Buffer and incubated at  $27^\circ\text{C}$  away from light for 1 hr. The FluxOR  
309 Red reagent is a non-fluorescent indicator dye which is loaded into cells as a membrane-  
310 permeable acetoxymethyl (AM)-ester. The non-fluorescent AM ester of the FluxOR Red reagent  
311 is cleaved by endogenous esterases into a fluorogenic  $\text{TI}^+$ -sensitive indicator. 1X Loading  
312 Buffer was subsequently removed and replaced with Dye-free Assay Buffer and FluxOR  
313 Background Suppressor. The assay was performed in 96-well, black-walled, clear-bottom plates  
314 (Costar). Fluorescence was measured on a Perkin-Elmer Envision Multilabel Plate Reader  
315 using bottom read fluorescence and a BODIPY TMR FP filter set (excitation 531 nm and 25 nm  
316 bandwidth, emission 595 nm and 60 nm bandwidth). Fluorescence measurements were made  
317 every 0.6 seconds for 300 counts. The recordings were baseline corrected by subtracting the  
318 average fluorescence from 180 seconds prior to the addition of Basal Potassium Stimulus buffer  
319 and time zero is defined as the first data point recorded after the addition of stimulus. Global fits  
320 of all data to a one phase association model  $Y = (\text{Plateau}) * (1 - e^{-(x/t)})$  are displayed with 95%  
321 confidence interval bands (Figure 1B). Alternatively, the final 50 counts were averaged as a  
322 measure of final fluorescence increase (Fig 1C, 4F).

323

### 324 **Protein purification**

325

326 Cells from 1 L of culture ( $\sim 7-12.5$  mL of cell pellet) were thawed in 100 mL of Lysis Buffer (50  
327 mM Tris, 150 mM KCl, 1 mM EDTA, pH 8.0). Protease inhibitors were added to the lysis buffer  
328 immediately before use (final concentrations: E64 (1  $\mu\text{M}$ ), Pepstatin A (1  $\mu\text{g}/\text{mL}$ ), Soy Trypsin  
329 Inhibitor (10  $\mu\text{g}/\text{mL}$ ), Benzimidazole (1 mM), Aprotinin (1  $\mu\text{g}/\text{mL}$ ), Leupeptin (1  $\mu\text{g}/\text{mL}$ ), and PMSF  
330 (1 mM)). Benzonase (5  $\mu\text{l}$ ) was added after cells thawed. Cells were then lysed by sonication  
331 and centrifuged at 150,000 x g for 45 min. The supernatant was discarded and residual nucleic  
332 acid was from the top of the membrane pellet by rinsing with DPBS. Membrane pellets were  
333 transferred to a glass dounce homogenizer containing Extraction Buffer (50 mM Tris, 150 mM  
334 KCl, 1 mM EDTA, 1% w/v n-Dodecyl- $\beta$ -D-Maltopyranoside (DDM, Anatrace, Maumee, OH),  
335 0.2% w/v Cholesterol Hemisuccinate Tris Salt (CHS, Anatrace), pH 8.0). A 10%/2% w/v solution  
336 of DDM/CHS was dissolved and clarified by bath sonication in 200 mM Tris pH 8.0 and

337 subsequently added to buffers at the indicated final concentrations. Membrane pellets were  
338 homogenized in Extraction Buffer and this mixture (100 mL final volume) was gently stirred at  
339 4°C for 1 hr. The extraction mixture was centrifuged at 33,000 x g for 45 min. The supernatant,  
340 containing solubilized KCC4-sfGFP, was bound to 5 mL of Sepharose resin coupled to anti-GFP  
341 nanobody for 1 hour at 4°C. The resin was collected in a column and washed with 20 mL of  
342 Buffer 1 (20 mM Tris, 150 mM KCl, 1 mM EDTA, 1% DDM, 0.2% CHS, pH 8.0), 50 mL of Buffer  
343 2 (20 mM Tris, 500 mM KCl, 1 mM EDTA, 1% DDM, 0.2% CHS, pH 8.0), and 20 mL of Buffer 1.  
344 Washed resin was resuspended in 6 mL of Buffer 1 with 0.5 mg of PPX and rocked gently in the  
345 capped column overnight. Cleaved KCC4 protein was eluted with an additional 25 mL of Buffer  
346 1. The eluted pool was concentrated to ~500 µl with an Amicon Ultra spin concentrator 100 kDa  
347 cutoff (MilliporeSigma, USA) and subjected to size exclusion chromatography using a Superose  
348 6 Increase column (GE Healthcare, Chicago, IL) run in Buffer 3 (20 mM Tris pH 8.0, 150 mM  
349 KCl, 1 mM EDTA, 1% DDM, 0.01% CHS) on a NGC system (Bio-Rad, Hercules, CA). Peak  
350 fractions containing KCC4 transporter were collected and concentrated.

351

### 352 **Cross linking and mass spectrometry**

353

354 Fractions corresponding to peaks 1 and 2 from size exclusion chromatography were separately  
355 pooled and concentrated to 0.5 mg/mL. Crosslinking was performed by adding 1 µL of  
356 glutaraldehyde from 10X stock solutions in water to 10 µL of KCC4 to achieve final  
357 glutaraldehyde concentrations of 0.02, 0.01, 0.005, 0.0025, and 0%. Samples were incubated  
358 for 30 minutes prior to quenching by addition of 1µL 1M Tris-HCl and analysis by SDS-PAGE on  
359 4 - 12% Tris-glycine gel (BioRad, USA). Deglycosylated samples were pretreated with 1:10  
360 volume purified PNGase at 1 mg/mL (Addgene 114274) for 1h at 4°C prior to the addition of  
361 glutaraldehyde.

362

363 For mass spectrometry, the band corresponding to purified KCC4 was excised from a 4 - 12%  
364 Tris-glycine gel, digested with trypsin in situ, and the resulting peptides extracted and  
365 concentrated. Mass spectrometry was performed by the Vincent J. Coates Proteomics/Mass  
366 Spectrometry Laboratory at UC Berkeley. A nano LC column was packed in a 100 µm inner  
367 diameter glass capillary with an emitter tip. The column consisted of 10 cm of Polaris c18 5 µm  
368 packing material (Varian), followed by 4 cm of Partisphere 5 SCX (Whatman). The column was  
369 loaded by use of a pressure bomb and washed extensively with buffer A (5% acetonitrile/ 0.02%  
370 heptafluorobutyric acid (HBFA)). The column was then directly coupled to an electrospray  
371 ionization source mounted on a Thermo-Fisher LTQ XL linear ion trap mass spectrometer. An  
372 Agilent 1200 HPLC equipped with a split line so as to deliver a flow rate of 300 nl/min was used  
373 for chromatography. Peptides were eluted using a 4-step MudPIT procedure<sup>42</sup>. Buffer A was 5%  
374 acetonitrile/ 0.02% heptafluorobutyric acid (HBFA); buffer B was 80% acetonitrile/ 0.02% HBFA.  
375 Buffer C was 250 mM ammonium acetate/ 5% acetonitrile/ 0.02% HBFA; buffer D was same as  
376 buffer C, but with 500 mM ammonium acetate.

377

378 Protein identification was done with IntegratedProteomics Pipeline (IP2, Integrated Proteomics  
379 Applications, Inc. San Diego, CA) using ProLuCID/Sequest, DTASelect2 and Census<sup>43-45</sup>.  
380 Tandem mass spectra were extracted into ms1 and ms2 files from raw files using  
381 RawExtractor<sup>46</sup>. Data was searched against a *Spodoptera frugiperda* protein database with the  
382 purified mouse KCC4 sequence added, supplemented with sequences of common  
383 contaminants, and concatenated to a to form a decoy database<sup>47</sup>. LTQ data was searched with  
384 3000.0 milli-amu precursor tolerance and the fragment ions were restricted to a 600.0 ppm  
385 tolerance. All searches were parallelized and searched on the VJC proteomics cluster. Search  
386 space included all half tryptic peptide candidates with no missed cleavage restrictions.  
387 Carbamidomethylation (+57.02146) of cysteine was considered a static modification. In order to



388 identify authentic termini, we required one tryptic terminus for each peptide identification. The  
389 ProLuCID search results were assembled and filtered using the DTASelect program with a  
390 peptide false discovery rate (FDR) of 0.001 for single peptides and a peptide FDR of 0.005 for  
391 additional peptides for the same protein. Under such filtering conditions, the estimated false  
392 discovery rate was less than 1%.

393

### 394 **Nanodisc reconstitution**

395

396 Freshly purified and concentrated KCC4 in Buffer 3 was reconstituted into MSP1D1 nanodiscs  
397 with a mixture of lipids (DOPE:POPS:POPC at 2:1:1 molar ratio, Avanti, Alabaster, Alabama) at  
398 a final molar ratio of KCC4:MSP1D1:lipids of 0.2:1:50. Lipids in chloroform were prepared by  
399 mixing, drying under argon, washing with pentane, drying under argon, and placed under  
400 vacuum overnight. The dried lipid mixture was rehydrated in Buffer 4 (20 mM Tris, 150 mM KCl,  
401 1 mM EDTA pH 8.0) and clarified by bath sonication. DDM was added to a final concentration of  
402 8 mM and the detergent solubilized lipids were sonicated until clear. Lipids, Buffer 4 containing  
403 8 mM DDM, and KCC4 protein were mixed and incubated at 4°C for 30 min before addition of  
404 purified MSP1D1. After addition of MSP1D1, the nanodisc formation solution was 47.5 μM  
405 KCC4, 104 μM MSP1D1, 13 mM DOPE:POPS:POPC, and 4 mM DDM in Buffer 4 (final  
406 concentrations). After mixing at 4°C for 30 mins, 60 mg of Biobeads SM2 (Bio-Rad, USA)  
407 (prepared by sequential washing in methanol, water, and Buffer 4 and weighed damp following  
408 bulk liquid removal) were added and the mixture was rotated at 4°C overnight (~12 hours).  
409 Nanodisc-containing supernatant was collected and spun for 10 min at 21,000 x g before  
410 loading onto a Superose 6 column in Buffer 4. Peak fractions corresponding to KCC4-MSP1D1  
411 were collected and spin concentrated using a 100 kDa cutoff for grid preparation.

412

### 413 **Grid preparation**

414

415 The KCC4-MSP1D1 nanodisc sample was concentrated to ~1 mg/mL and centrifuged at 21,000  
416 x g for 10 min at 4°C prior to grid preparation. A 3 μL drop of protein was applied to a freshly  
417 glow discharged Holey Carbon, 400 mesh R 1.2/1.3 gold grid (Quantifoil, Großlobichau,  
418 Germany). A Vitrobot Mark IV (FEI / Thermo Scientific, USA) was utilized for plunge freezing in  
419 liquid ethane with the following settings: 4°C, 100% humidity, 1 blot force, 3s blot time, 5s wait  
420 time. The KCC4 detergent sample was frozen at 4.5 mg/mL and centrifuged at 21,000 x g for 10  
421 min at 4°C prior to grid preparation. A 3 μL drop of protein was applied to a freshly glow  
422 discharged Holey Carbon, 400 mesh R 1.2/1.3 gold grid. A Vitrobot Mark IV (FEI / Thermo  
423 Scientific, USA) was utilized for plunge freezing in liquid ethane with the following settings: 4°C,  
424 100% humidity, 1 blot force, 4s blot time, 1s wait time. Grids were clipped in autoloader  
425 cartridges for data collection.

426

### 427 **Data collection**

428

429 KCC4-MSP1D1 grids were transferred to a Talos Arctica cryo-electron microscope (FEI /  
430 Thermo Scientific, USA) operated at an acceleration voltage of 200 kV. Images were recorded  
431 in an automated fashion with SerialEM<sup>48</sup> using image shift with a target defocus range of -0.7 ~  
432 -2.2 μm over 5s as 50 subframes with a K3 direct electron detector (Gatan, USA) in super-  
433 resolution mode with a super-resolution pixel size of 0.5685 Å. The electron dose was 9.333 e<sup>-</sup> /  
434 Å<sup>2</sup> / s (0.9333 e<sup>-</sup> / Å<sup>2</sup>/frame) at the detector level and total accumulated dose was 46.665 e<sup>-</sup>/Å<sup>2</sup>.  
435 KCC4-detergent grids were transferred to a Titan Krios cryo-electron microscope (FEI / Thermo  
436 Scientific, USA) operated at an acceleration voltage of 300 kV. Images were recorded in an  
437 automated fashion with SerialEM<sup>48</sup> with a target defocus range of -0.7 to -2.2 μm over 9.6 s as  
438 48 subframes with a K2 direct electron detector (Gatan, USA) in super-resolution mode with a

439 super-resolution pixel size of 0.5746 Å. The electron dose was 6.092 e<sup>-</sup> / Å<sup>2</sup> / s (1.2184 e<sup>-</sup> / Å<sup>2</sup> /  
440 frame) at the detector level and total accumulated dose was 58.4832 e<sup>-</sup>/Å<sup>2</sup>. See also Table 1 for  
441 data collection statistics.

442

## 443 Data processing

444

445 The processing pipeline is shown in Figure S5A-C. We used Cryosparc2<sup>49</sup> for initial model  
446 generation and refinement until reconstructions reached 4-5 Å resolution. Bayesian polishing  
447 and nanodisc subtraction in Relion 3.0.7<sup>50,51</sup> were used to achieve highest resolution  
448 reconstructions. While the contribution of disordered or flexible N- and C-terminal regions to  
449 alignments is unknown, the remaining 55 kDa asymmetric membrane protein is among the  
450 smallest in terms of resolved mass resolved by cryo-EM to date.

451

452 A total of 1559 movie stacks were collected, motion-corrected and binned to 1.137 Å/pixel using  
453 MotionCor2<sup>52</sup>, and CTF-corrected using Ctffind 4.1.13<sup>53</sup> (Figure S5A). Micrographs with a  
454 Ctffind reported resolution estimate worse than 5 Å were discarded. A small number of particles  
455 (~1000) were picked manually and subjected to two-dimensional classification to generate  
456 references for autopicking in Relion. 1,826,000 particles were autopicked and extracted at 2.274  
457 Å/pixel (2x binned) for initial cleanup. Non-particle picks and apparent junk particles were  
458 removed by several rounds of two-dimensional class averaging. The remaining 887,132  
459 particles were extracted at 1.137 Å/pixel and imported into Cryosparc. An additional round of 2D  
460 classification generated a particle set of 491,111. These particles were the input of an ab initio  
461 reconstruction (non-default values: 4 classes, 0.1 class similarity, 4 Å max resolution, per-image  
462 optimal scales). 2D classification of particles (160,868) that contributed to the most featured  
463 volume resulted in a set of 125,593 particles which were the input of an ab initio reconstruction.  
464 Alignments were iteratively improved using non-uniform (NU) refinement (0.89 window inner  
465 radius, 120 voxel box size, 10 extra final passes, 10 Å low-pass filter, 0.01 batch epsilon,  
466 minimize over per-particle scale, 1-4 Å dynamic mask near, 3-8 Å dynamic mask far, 6-10 Å  
467 dynamic mask start resolution, 4-6 Å local processing start resolution). Two separate NU  
468 refinement output volumes were input into a heterogeneous refinement job of the 886,528  
469 particle set (forced hard classification, 10 Å initial resolution, 5 final full iterations). The more  
470 featured class (538,280 particles) was heterogeneously refined (forced hard classification, 10 Å  
471 initial resolution, 5 final full iterations) (Figure S5B). The particles and volume from one output  
472 (354,234 particles) were input into the first of three iterative NU refinements (10 extra final  
473 passes for the second and third iteration).

474

475 Particle positions and angles from the final cryoSPARC2 refinement job were input into Relion  
476 (using csparc2relion.py from the UCSF PyEM<sup>59</sup>) and 3D refined to generate a 4.18 Å map (6 Å  
477 low-pass filter, 0.9 degrees initial sampling, 0.9 degrees local searches) (Figure S5C). A second  
478 3D refinement following Bayesian particle polishing improved the map and reported resolution  
479 (4.01 Å) (6 Å low-pass filter, 0.9 degrees initial sampling, 0.9 degrees local searches). CTF  
480 refinement with beam tilt group estimation and per-particle defocus was performed, although  
481 subsequent 3D refinement did not markedly improve the map. Particle subtraction was  
482 performed to remove the contribution of the nanodisc density from alignments and subsequent  
483 3D refinement markedly improved the map (reported resolution 3.86 Å or 3.72 Å after  
484 postprocessing) (6 Å low-pass filter, 0.9 degrees initial sampling, 0.9 degrees local searches). A  
485 final improvement in map quality and reported resolution and was obtained by removing poor  
486 particles with a 3D classification job (2 classes, 10 Å initial low-pass filter, 16 tau fudge, no  
487 angular sampling). The final particle set (110,143) was subjected to 3D refinement to generate a  
488 final map at 3.72 Å resolution (3.65 Å after postprocessing) (6 Å low-pass filter, 0.9 degrees  
489 initial sampling, 0.9 degrees local searches). Particle distribution and local resolution was

490 calculated using Relion (Figure S6A,B). FSCs reported in Figure S6C were calculated using  
491 Phenix.mtriage.

492

### 493 **Modeling, refinement, and structure analysis**

494

495 The final cryo-EM maps were sharpened using Phenix.autosharpen<sup>54</sup>. The structure was  
496 modeled de novo in Coot and refined in real space using Phenix.real\_space\_refine with  
497 Ramachandran and NCS restraints. Validation tools in Phenix, EMRinger<sup>55</sup>, and Molprobit<sup>56</sup>  
498 were used to guide iterative rounds of model adjustment in Coot and refinement in Phenix.  
499 Cavity measurements were made with HOLE implemented in Coot<sup>57</sup>. Electrostatic potential was  
500 calculated using APBS-PDB2PQR<sup>58</sup> Pymol plugin. Figures were prepared using PyMOL,  
501 Chimera, ChimeraX, Fiji, Prism, Adobe Photoshop, and Adobe Illustrator software.

502

### 503 **Acknowledgements**

504

505 We thank members of the Dr. E. Park and Brohawn laboratories, in particular C. Hoel, T.  
506 Turney, and Dr. B. Li, for feedback and critical reading of the manuscript. We thank Dr. D. Toso,  
507 Dr. J. Remis, and P. Tobias at the Berkeley Bay Area Cryo-EM facility and UC Berkeley Talos  
508 Arctica facility for assistance with microscope setup and data collection. We thank Dr. L.  
509 Kohlstaedt for assistance with mass spectrometry. This work used the Vincent J.  
510 Proteomics/Mass Spectrometry Laboratory at UC Berkeley, supported in part by NIH S10  
511 Instrumentation Grant S10RR025622. We thank Dr. P. He and Dr. M. West of the High-  
512 Throughput Screening Facility (HTSF) at UC Berkeley for technical assistance. This work was  
513 performed in part in the HTSF. SGB is a New York Stem Cell Foundation-Robertson  
514 Neuroscience Investigator. This work is supported by a UC Berkeley Chancellor's Fellowship  
515 (MSR), a NIGMS postdoctoral fellowship F32GM128263 (DMK), the New York Stem Cell  
516 Foundation (SGB), NIGMS grant DP2GM123496-01 (SGB), a McKnight Foundation Scholar  
517 Award (SGB), and a Klingenstein-Simons Foundation Fellowship Award (SGB).

518

### 519 **Data availability**

520

521 The final map of KCC4 in MSP1D1 nanodiscs has been deposited to the Electron Microscopy  
522 Data Bank under accession code EMD-20807. Atomic coordinates have been deposited in the  
523 PDB under ID 6UKN. Original KCC4 in MSP1D1 nanodiscs micrograph movies have been  
524 deposited to EMPIAR.

## 525 References

- 526
- 527 1. Arroyo, J. P., Kahle, K. T. & Gamba, G. The SLC12 family of electroneutral cation-
- 528 coupled chloride cotransporters. *Molecular Aspects of Medicine* **34**, 288–298
- 529 (2013).
- 530 2. Marcoux, A. A. *et al.* Molecular features and physiological roles of K<sup>+</sup>-Cl<sup>-</sup>
- 531 cotransporter 4 (KCC4). *Biochim Biophys Acta Gen Subj* **1861**, 3154–3166 (2017).
- 532 3. Gamba, G. Molecular physiology and pathophysiology of electroneutral cation-
- 533 chloride cotransporters. *Physiol Rev* **85**, 423–493 (2005).
- 534 4. Dunham, P. B., Stewart, G. W. & Ellory, J. C. Chloride-activated passive potassium
- 535 transport in human erythrocytes. *Proc Natl Acad Sci USA* **77**, 1711–1715 (1980).
- 536 5. Lauf, P. K. & Theg, B. E. A chloride dependent K<sup>+</sup> flux induced by N-
- 537 ethylmaleimide in genetically low K<sup>+</sup> sheep and goat erythrocytes. *Biochem*
- 538 *Biophys Res Commun* **92**, 1422–1428 (1980).
- 539 6. Singhvi, A. *et al.* A Glial K/Cl Transporter Controls Neuronal Receptive Ending
- 540 Shape by Chloride Inhibition of an rGC. *Cell* **165**, 936–948 (2016).
- 541 7. Jin, S. C. *et al.* SLC12A ion transporter mutations in sporadic and familial human
- 542 congenital hydrocephalus. *Mol Genet Genomic Med* e892 (2019).
- 543 doi:10.1002/mgg3.892
- 544 8. Kahle, K. T. *et al.* K-Cl cotransporters, cell volume homeostasis, and neurological
- 545 disease. *Trends in Molecular Medicine* **21**, 513–523 (2015).
- 546 9. Bergeron, M. J., Gagnon, É., Wallendorff, B., Lapointe, J.-Y. & Isenring, P.
- 547 Ammonium transport and pH regulation by K<sup>+</sup>-Cl<sup>-</sup>-cotransporters. *American*
- 548 *Journal of Physiology-Renal Physiology* **285**, F68–F78 (2003).
- 549 10. Mount, D. B. *et al.* Cloning and characterization of KCC3 and KCC4, new members
- 550 of the cation-chloride cotransporter gene family. *J Biol Chem* **274**, 16355–16362
- 551 (1999).
- 552 11. Karadsheh, M. F., Byun, N., Mount, D. B. & Delpire, E. Localization of the KCC4
- 553 potassium-chloride cotransporter in the nervous system. *Neuroscience* **123**, 381–
- 554 391 (2004).
- 555 12. Boettger, T. *et al.* Deafness and renal tubular acidosis in mice lacking the K-Cl co-
- 556 cotransporter Kcc4. *Nature* **416**, 874–878 (2002).
- 557 13. Payne, J. A. *Chapter Six – Molecular Operation of the Cation Chloride*
- 558 *Cotransporters: Ion Binding and Inhibitor Interaction. Current Topics in Membranes*
- 559 **70**, 215–237 (Elsevier, 2012).
- 560 14. Hartmann, A.-M. & Nothwang, H. G. Molecular and evolutionary insights into the
- 561 structural organization of cation chloride cotransporters. *Front Cell Neurosci* **8**, 470
- 562 (2014).
- 563 15. Shi, Y. Common Folds and Transport Mechanisms of Secondary Active
- 564 Transporters. *Annual review of biophysics* **42**, 51–72 (2013).
- 565 16. Rinehart, J. *et al.* Sites of Regulated Phosphorylation that Control K-Cl
- 566 Cotransporter Activity. *Cell* **138**, 525–536 (2009).
- 567 17. Bergeron, M. J. *et al.* Phosphoregulation of K<sup>+</sup>-Cl<sup>-</sup>-cotransporter 4 during changes
- 568 in intracellular Cl<sup>-</sup> and cell volume. *J Cell Physiol* **219**, 787–796 (2009).
- 569 18. Frenette-Cotton, R., Marcoux, A.-A., Garneau, A. P., Noel, M. & Isenring, P.
- 570 Phosphoregulation of K<sup>+</sup>-Cl<sup>-</sup>-cotransporters during cell swelling: Novel insights. *J*
- 571 *Cell Physiol* **233**, 396–408 (2017).
- 572 19. Melo, Z. *et al.* N-terminal serine dephosphorylation is required for KCC3
- 573 cotransporter full activation by cell swelling. *Journal of Biological Chemistry* **288**,
- 574 31468–31476 (2013).

- 575 20. Hartmann, A.-M. *et al.* Differences in the large extracellular loop between the K(+)-  
576 Cl(-) cotransporters KCC2 and KCC4. *Journal of Biological Chemistry* **285**, 23994–  
577 24002 (2010).
- 578 21. Rivera, C. *et al.* The K+/Cl- co-transporter KCC2 renders GABA hyperpolarizing  
579 during neuronal maturation. *Nature* **397**, 251–255 (1999).
- 580 22. Blaesse, P. *et al.* Oligomerization of KCC2 correlates with development of inhibitory  
581 neurotransmission. *Journal of Neuroscience* **26**, 10407–10419 (2006).
- 582 23. Puskarjov, M., Ahmad, F., Kaila, K. & Blaesse, P. Activity-Dependent Cleavage of  
583 the K-Cl Cotransporter KCC2 Mediated by Calcium-Activated Protease Calpain. *J*  
584 *Neurosci* **32**, 11356–11364 (2012).
- 585 24. Simard, C. F. *et al.* Homooligomeric and heterooligomeric associations between  
586 K+-Cl- cotransporter isoforms and between K+-Cl- and Na+-K+-Cl- cotransporters.  
587 *J Biol Chem* **282**, 18083–18093 (2007).
- 588 25. Zhang, D., Gopalakrishnan, S. M., Freiberg, G. & Surowy, C. S. A Thallium  
589 Transport FLIPR-Based Assay for the Identification of KCC2-Positive Modulators.  
590 *Journal of Biomolecular Screening* **15**, 177–184 (2010).
- 591 26. Kern, D. M., Oh, S., Hite, R. K. & Brohawn, S. G. Cryo-EM structures of the DCPIB-  
592 inhibited volume-regulated anion channel LRRC8A in lipid nanodiscs. *eLife* **8**, 551  
593 (2019).
- 594 27. Agez, M. *et al.* Molecular architecture of potassium chloride co-transporter KCC2.  
595 *Scientific Reports* 1–14 (2017). doi:10.1038/s41598-017-15739-1
- 596 28. Ingólfsson, H. I. *et al.* Computational Lipidomics of the Neuronal Plasma  
597 Membrane. *Biophys J* **113**, 2271–2280 (2017).
- 598 29. *Reconstitution of Membrane Proteins in Phospholipid Bilayer Nanodiscs. IMAGING*  
599 *AND SPECTROSCOPIC ANALYSIS OF LIVING CELLS* **464**, 211–231 (Elsevier  
600 Masson SAS, 2009).
- 601 30. Chew, T. A. *et al.* Structure and mechanism of the cation-chloride cotransporter  
602 NKCC1. *Nature* **572**, 488–492 (2019).
- 603 31. Warmuth, S., Zimmermann, I. & Dutzler, R. X-ray Structure of the C-Terminal  
604 Domain of a Prokaryotic Cation-Chloride Cotransporter. *Structure* **17**, 538–546  
605 (2009).
- 606 32. Weng, T.-Y. *et al.* Glycosylation regulates the function and membrane localization  
607 of KCC4. *BBA - Molecular Cell Research* **1833**, 1133–1146 (2013).
- 608 33. Yamashita, A., Singh, S. K., Kawate, T., Jin, Y. & Gouaux, E. Crystal structure of a  
609 bacterial homologue of Na+/Cl--dependent neurotransmitter transporters. *Nature*  
610 **437**, 215–223 (2005).
- 611 34. Krishnamurthy, H. & Gouaux, E. X-ray structures of LeuT in substrate-free outward-  
612 open and apo inward-open states. *Nature* **481**, 469–474 (2012).
- 613 35. Penmatsa, A. & Gouaux, E. How LeuT shapes our understanding of the  
614 mechanisms of sodium-coupled neurotransmitter transporters. *J Physiol (Lond)*  
615 **592**, 863–869 (2013).
- 616 36. Dutzler, R., Campbell, E. B. & Mackinnon, R. Gating the selectivity filter in ClC  
617 chloride channels. *Science* **300**, 108–112 (2003).
- 618 37. Wahlgren, W. Y. *et al.* Substrate-bound outward-open structure of a Na+-coupled  
619 sialic acid symporter reveals a new Na+ site. *Nature Communications* **9**, 1753–14  
620 (2018).
- 621 38. Watanabe, M., Wake, H., Moorhouse, A. J. & Nabekura, J. Clustering of neuronal  
622 K+-Cl- cotransporters in lipid rafts by tyrosine phosphorylation. *Journal of Biological*  
623 *Chemistry* **284**, 27980–27988 (2009).

- 624 39. Mahadevan, V. *et al.* Kainate Receptors Coexist in a Functional Complex with  
625 KCC2 and Regulate Chloride Homeostasis in Hippocampal Neurons. *CellReports* **7**,  
626 1762–1770 (2014).
- 627 40. Goutierre, M. *et al.* KCC2 Regulates Neuronal Excitability and Hippocampal Activity  
628 via Interaction with Task-3 Channels. *CellReports* **28**, 91–103.e7 (2019).
- 629 41. Ivakine, E. A. *et al.* Neto2 is a KCC2 interacting protein required for neuronal Cl<sup>-</sup>  
630 regulation in hippocampal neurons. *Proc Natl Acad Sci USA* **110**, 3561–3566  
631 (2013).
- 632 42. Washburn, M. P., Wolters, D. & Yates, J. R. Large-scale analysis of the yeast  
633 proteome by multidimensional protein identification technology. *Nat. Biotechnol.* **19**,  
634 242–247 (2001).
- 635 43. Xu, T. *et al.* ProLuCID: An improved SEQUEST-like algorithm with enhanced  
636 sensitivity and specificity. *Journal of Proteomics* **129**, 16–24 (2015).
- 637 44. Tabb, D. L., McDonald, W. H., research, J. Y. J. O. P.2002. DTASelect and  
638 Contrast: tools for assembling and comparing protein identifications from shotgun  
639 proteomics. *ACS Publications* **1**, 21–26 (2002).
- 640 45. Park, S. K., Venable, J. D., Xu, T. & Yates, J. R. A quantitative analysis software  
641 tool for mass spectrometry–based proteomics. *Nat Meth* **5**, 319–322 (2008).
- 642 46. McDonald, W. H. *et al.* MS1, MS2, and SQT—three unified, compact, and easily  
643 parsed file formats for the storage of shotgun proteomic spectra and identifications.  
644 *Rapid Commun. Mass Spectrom.* **18**, 2162–2168 (2004).
- 645 47. Peng, J., Elias, J. E., Thoreen, C. C., Licklider, L. J. & Gygi, S. P. Evaluation of  
646 Multidimensional Chromatography Coupled with Tandem Mass Spectrometry  
647 (LC/LC–MS/MS) for Large-Scale Protein Analysis: The Yeast Proteome. *J.*  
648 *Proteome Res.* **2**, 43–50 (2003).
- 649 48. Mastronarde, D. N. Automated electron microscope tomography using robust  
650 prediction of specimen movements. *J. Struct. Biol.* **152**, 36–51 (2005).
- 651 49. cryoSPARC: algorithms for rapid unsupervised cryo-EM structure determination.  
652 *Nat Meth* **14**, 290–296 (2017).
- 653 50. Zivanov, J., Nakane, T. & Scheres, S. H. W. A Bayesian approach to beam-induced  
654 motion correction in cryo-EM single-particle analysis. *IUCrJ* **6**, 5–17 (2019).
- 655 51. Zivanov, J. *et al.* New tools for automated high-resolution cryo-EM structure  
656 determination in RELION-3. *eLife* **7**, 163 (2018).
- 657 52. Zheng, S. Q. *et al.* MotionCor2: anisotropic correction of beam-induced motion for  
658 improved cryo-electron microscopy. *Nat Meth* **14**, 331–332 (2017).
- 659 53. Rohou, A. & Grigorieff, N. CTFIND4: Fast and accurate defocus estimation from  
660 electron micrographs. *J. Struct. Biol.* **192**, 216–221 (2015).
- 661 54. Adams, P. D. *et al.* PHENIX: a comprehensive Python-based system for  
662 macromolecular structure solution. *Acta Crystallogr D Biol Crystallogr* **66**, 213–221  
663 (2010).
- 664 55. Barad, B. A. *et al.* EMRinger: side chain–directed model and map validation for 3D  
665 cryo-electron microscopy. *Nat Meth* **12**, 943–946 (2015).
- 666 56. Chen, V. B. *et al.* MolProbity: all-atom structure validation for macromolecular  
667 crystallography. *Acta Crystallogr D Biol Crystallogr* **66**, 12–21 (2010).
- 668 57. Emsley, P., Lohkamp, B., Scott, W. G. & Cowtan, K. Features and development of  
669 Coot. *Acta Crystallogr D Biol Crystallogr* **66**, 486–501 (2010).
- 670 58. Dolinsky, T. J., Nielsen, J. E., McCammon, J. A. & Baker, N. A. PDB2PQR: an  
671 automated pipeline for the setup of Poisson-Boltzmann electrostatics calculations.  
672 *Nucleic Acids Res.* **32**, W665–W667 (2004).
- 673 59. Asamow D (2016) UCSF Pyem. GitHub Available at:  
674 <https://github.com/asamow/pyem>

## Figure 1

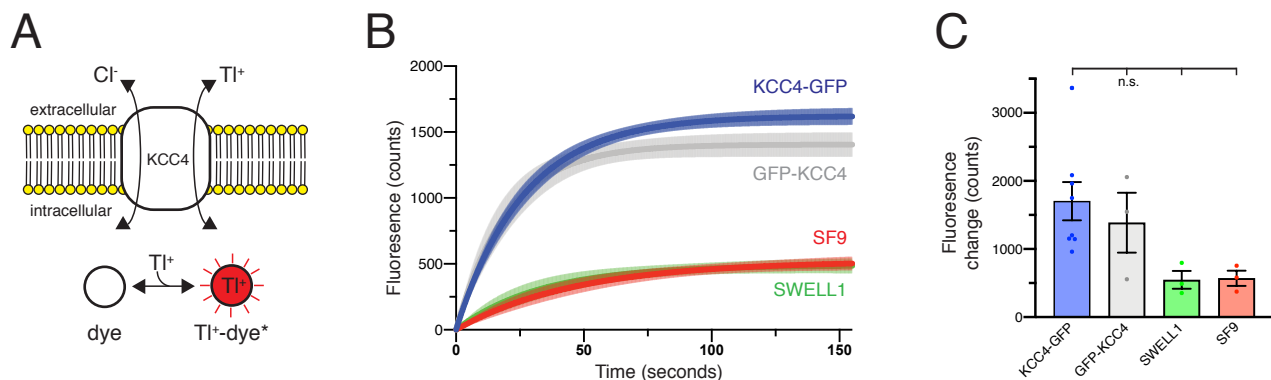

### Figure 1 – Transport activity of mouse KCC4

(A) A TI<sup>+</sup> uptake assay for KCC4 activity. KCC4 activity in SF9 cells results in TI<sup>+</sup> uptake and increased fluorescence of the TI<sup>+</sup> sensitive dye FluxOR Red. (B) Fluorescence values as a function of time for each construct assayed. Lines are global exponential fits to all data with 95% confidence intervals shown for KCC4-GFP (n=8, blue), GFP-KCC4 (n=3, gray), SWELL1 (n=3, green), and uninfected SF9 cells (n=3 red). (C) Quantification of experiments shown in (B). Average final fluorescence over 25s is plotted. KCC4-GFP 1703±280.1 (n=8) GFP-KCC4 1387±440.0 (n=3) SWELL1 546.6±131.3 (n=3) SF9 570.2±110.6 (n=3). Statistical differences assessed with one-way Anova (n.s. = not significant, \* = p<0.05).

## Figure 2

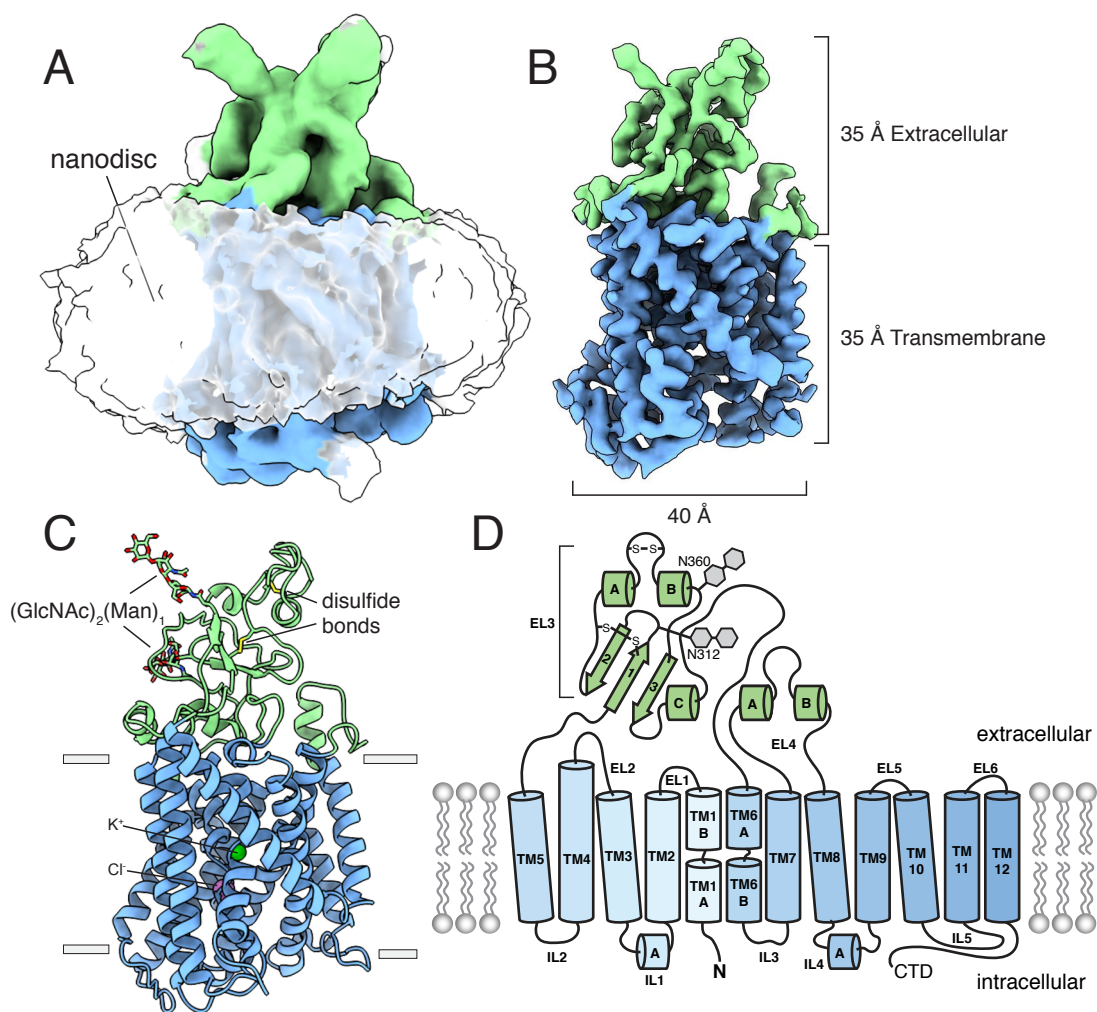

### Figure 2 - Structure of mouse KCC4 in lipid nanodiscs.

(A) Cryo-EM map from an unmasked refinement viewed from the membrane plane showing the position of nanodisc, transmembrane region (blue), and extracellular region (green). (B) Final map, (C) corresponding atomic model, and (D) cartoon representation of KCC4. In (C), bound  $K^+$  and  $Cl^-$  ions are shown as green and violet spheres, respectively. Three disulfides and two N-linked glycosylation sites are shown as sticks and labeled in the cartoon.



## Figure 3

bioRxiv preprint doi: <https://doi.org/10.1101/315267>; this version posted October 14, 2019. The copyright holder for this preprint (which was not certified by peer review) is the author/funder, who has granted bioRxiv a license to display the preprint in perpetuity. It is made available under aCC-BY 4.0 International license.

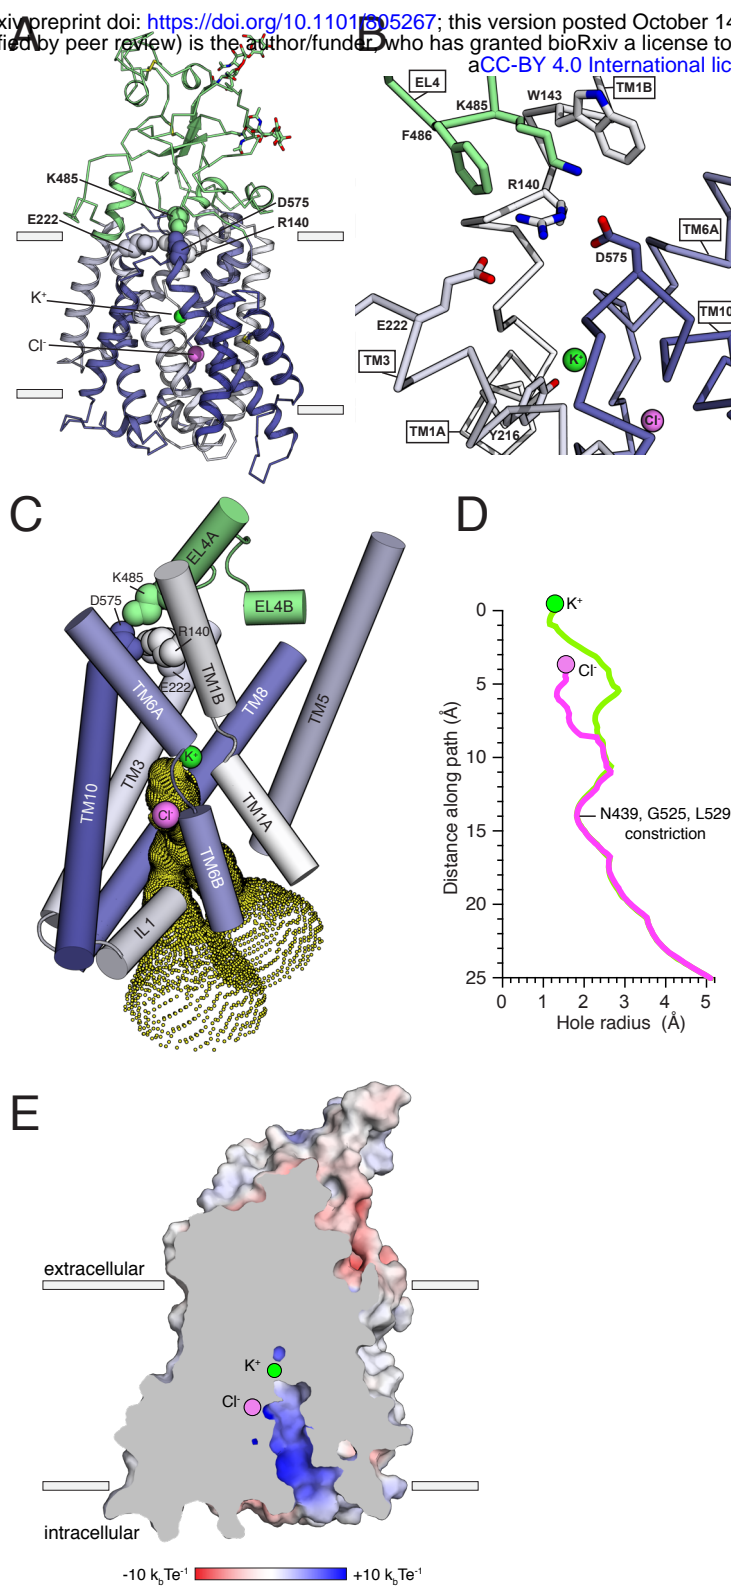

### Figure 3 – Inward-open conformation of KCC4.

(A) Cartoon representation of KCC4 colored with extracellular region green and transmembrane region colored in a gradient from white to blue from N- to C-terminus. Ions and residues forming an extracellular gate are shown as spheres. (B) Close-up view of extracellular gate. Residues forming the electrostatic interaction network are shown as sticks. (C) View of the open pathway to the intracellular ion binding sites. Helices surrounding the ion binding sites are shown as cylinders. Yellow dots demarcate the surface of a bifurcated tunnel that connects the ion binding sites to the cytoplasmic solution. (D) Radius of the ion access tunnel as a function of distance along the path for Cl<sup>-</sup> (pink) and K<sup>+</sup> (green). (E) Electrostatic surface representation of KCC4 sliced to show one leg of the cytoplasmic access tunnel.

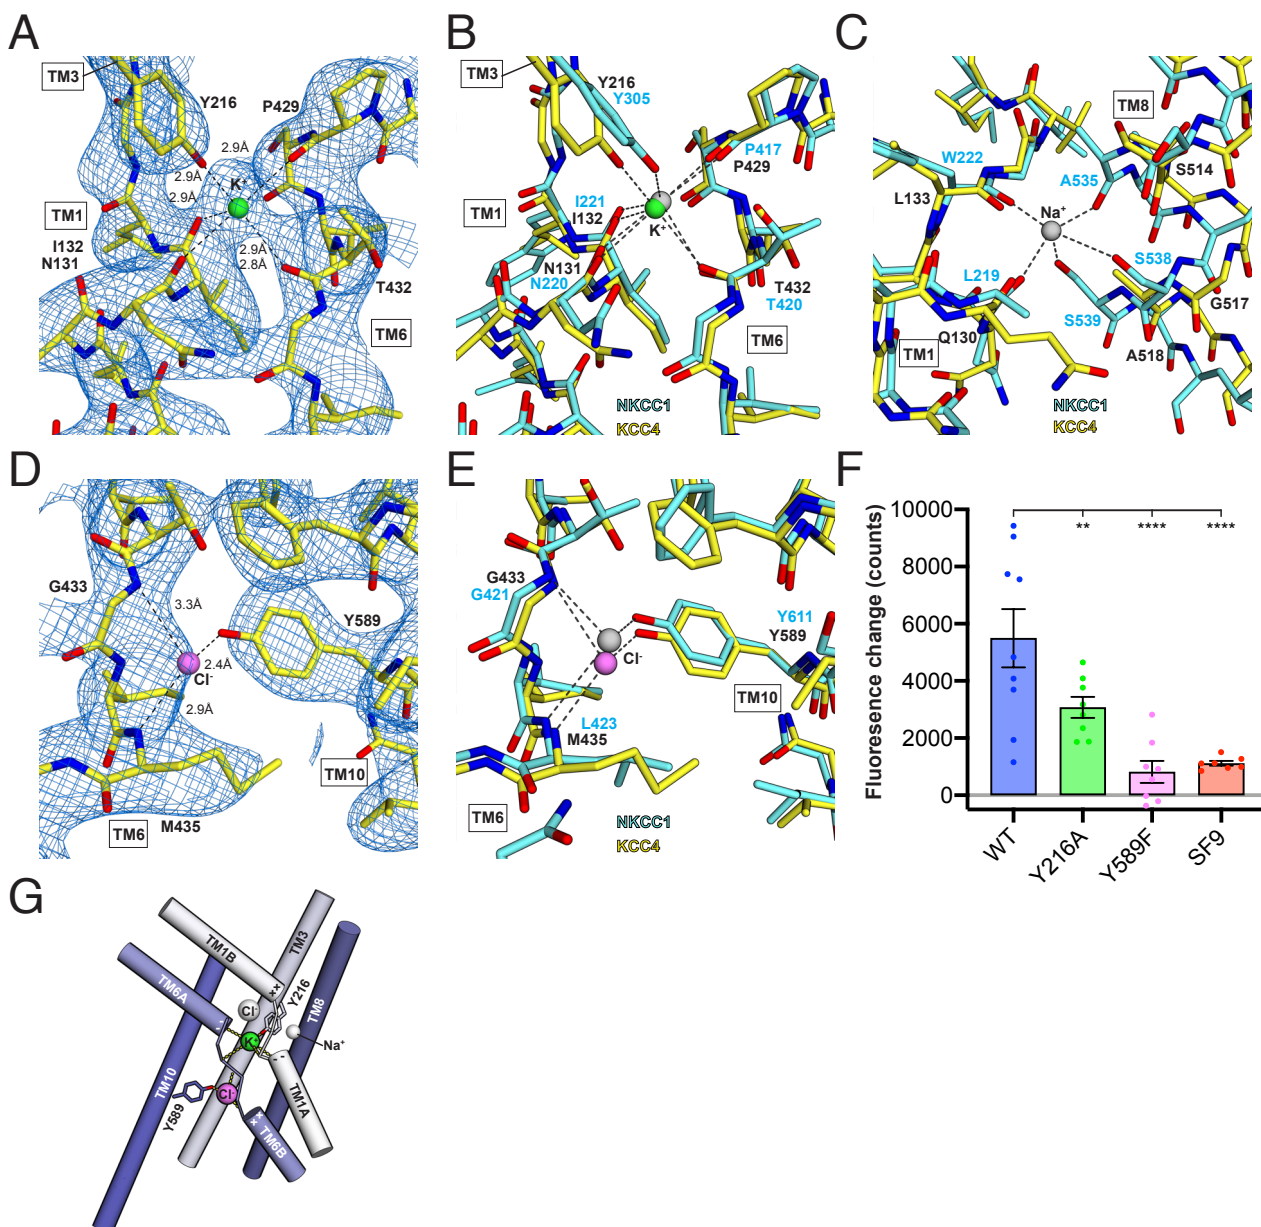

### Figure 4 – Ion binding sites.

(A) K<sup>+</sup> binding site. The cryo-EM map is shown as blue mesh and KCC4 is colored with carbon yellow, oxygen red, nitrogen blue, and K<sup>+</sup> green. K<sup>+</sup>-coordination environment is indicated with dashed lines. (B) Superposition of K<sup>+</sup> binding sites in KCC4 (depicted as in (A)) and NKCC1 (PDB:6NPL) colored with carbons cyan and K<sup>+</sup> gray. (C) Superposition of Na<sup>+</sup> binding site *Danio rerio* NKCC1 and analogous region in KCC4. The position of the Na<sup>+</sup> ion is inferred from SiaT (PDB:5NVA). (D) Cl<sup>-</sup> binding site and (E) superposition of Cl<sup>-</sup> binding site in KCC4 with analogous site in NKCC1. (F) Activity of mutants in ion binding sites. Average final fluorescence over 25s is plotted. Wild-type KCC4 5496±1018 (mean±SEM, n=9), Y216A 3073±365.6 (n=8), Y589F 818.5±385.5 (n=8), and uninfected SF9 1116±82.64 (n=7). Statistical differences assessed with one-way Anova (\*\* p<0.01, \*\*\*\* p<0.0001). (G) Model for substrate binding and transport stoichiometry in CCC transporters. Helices are shown as cylinders with ion coordination in KCC4 shown as dashed lines to green K<sup>+</sup> and violet Cl<sup>-</sup>. Helix dipoles in discontinuous helices TM1 and TM6 are indicated. Additional ion binding sites in NKCC1 not observed in KCC4 (an upper Cl<sup>-</sup> and a Na<sup>+</sup> site) are shown as transparent spheres.

# Figure S1

A

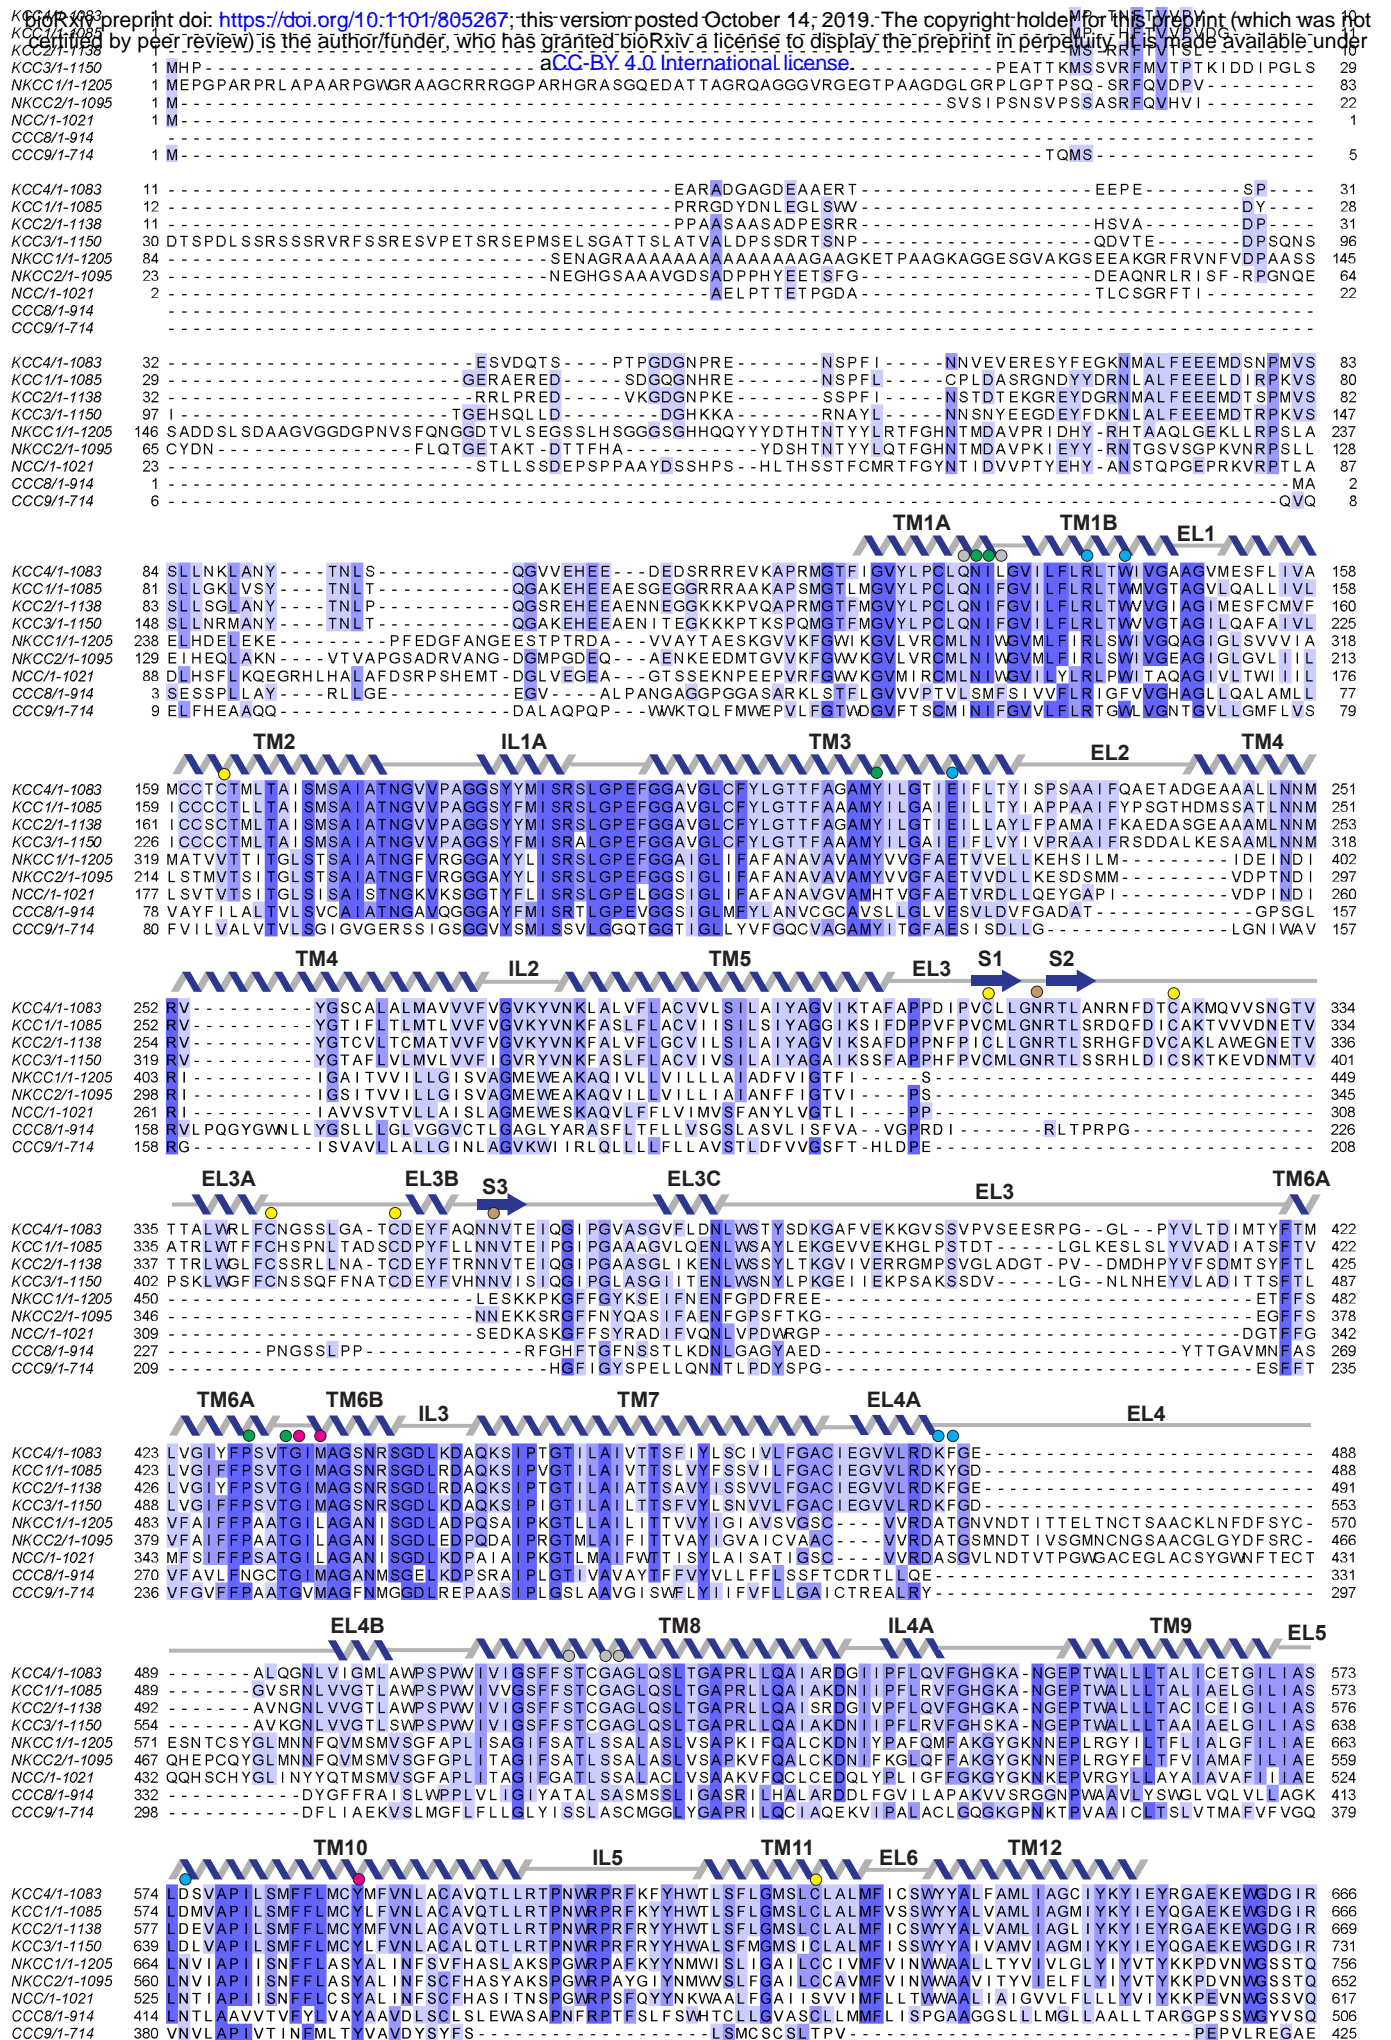

# Figure S1

bioRxiv preprint doi: <https://doi.org/10.1101/805267>; this version posted October 14, 2019. The copyright holder for this preprint (which was not certified by peer review) is the author/funder, who has granted bioRxiv a license to display the preprint in perpetuity. It is made available under aCC-BY 4.0 International license.

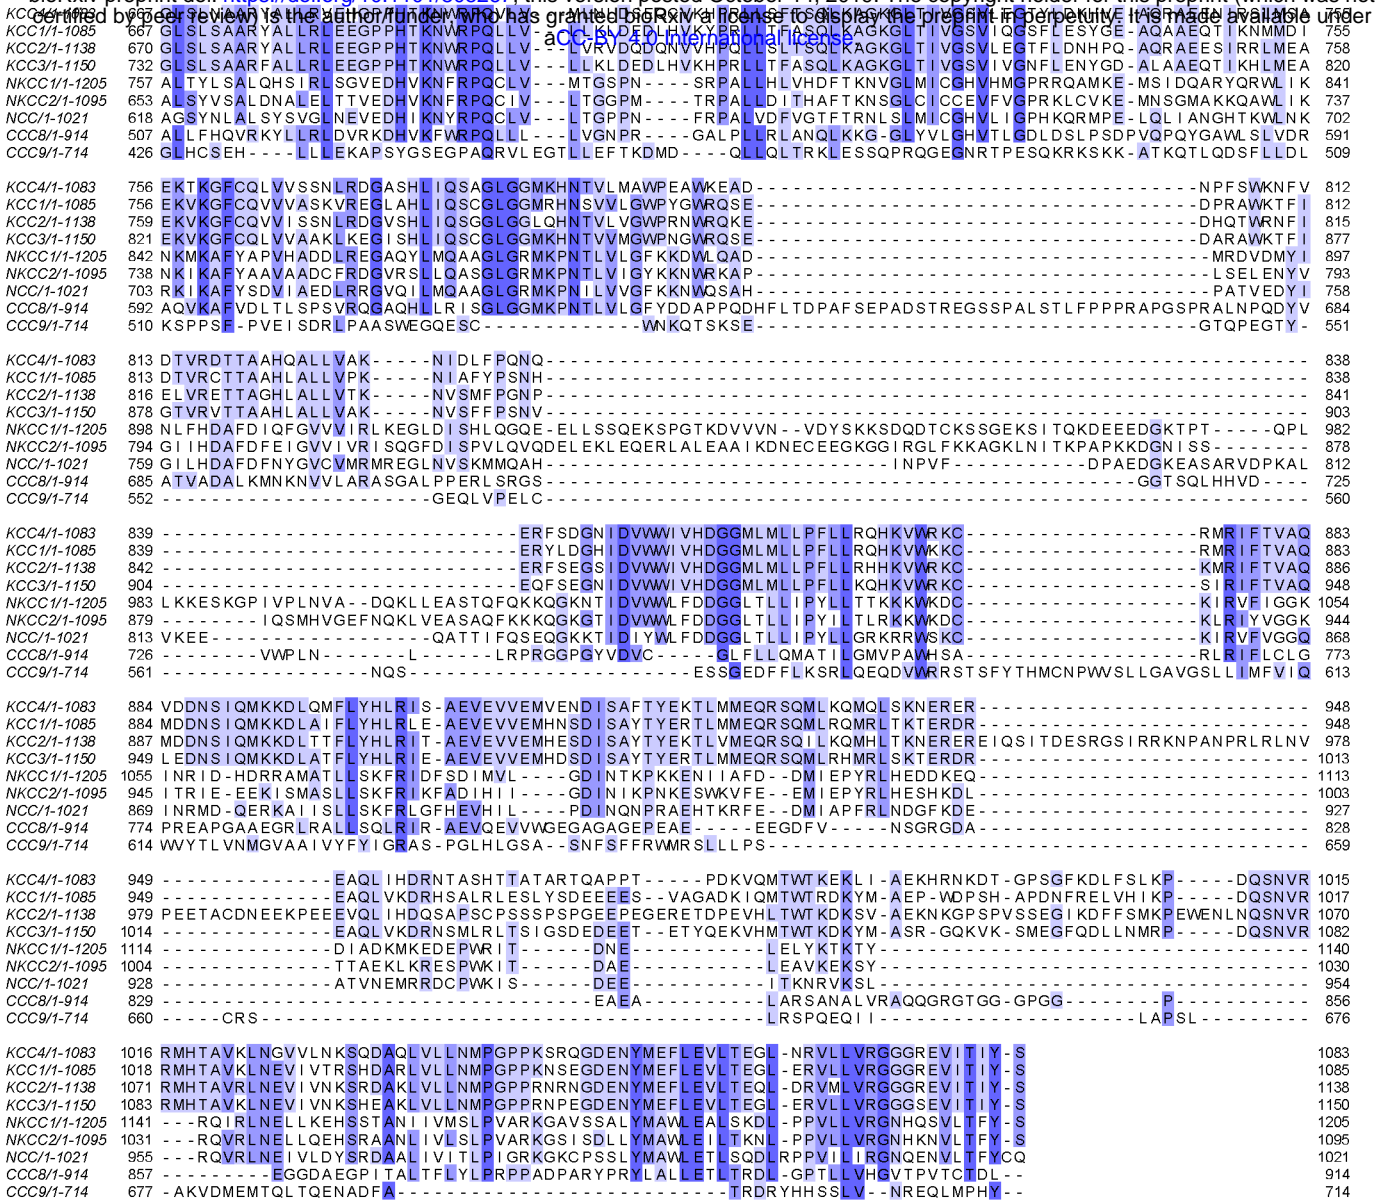

**B**

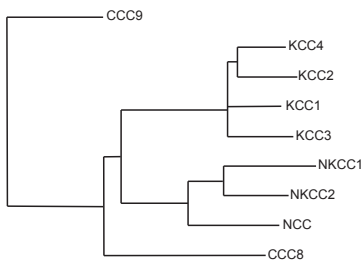

**C**

|       | KCC4 | KCC1 | KCC2 | KCC3 | NKCC1 | NKCC2 | NCC | CCC8 |
|-------|------|------|------|------|-------|-------|-----|------|
| KCC1  | 70   |      |      |      |       |       |     |      |
| KCC2  | 70   | 67   |      |      |       |       |     |      |
| KCC3  | 69   | 76   | 68   |      |       |       |     |      |
| NKCC1 | 26   | 27   | 25   | 25   |       |       |     |      |
| NKCC2 | 25   | 26   | 24   | 26   | 63    |       |     |      |
| NCC   | 25   | 25   | 25   | 25   | 51    | 50    |     |      |
| CCC8  | 26   | 27   | 26   | 25   | 27    | 26    | 23  |      |
| CCC9  | 21   | 21   | 21   | 22   | 24    | 22    | 23  | 25   |

## Supplemental Figure 1 – CCC family sequence alignment

(A) Sequence alignment of mouse CCC family transporters. Sequence numbering is indicated at the left and right of each line. Secondary structure for KCC4 is indicated above the sequence. Residues discussed in the text are indicated with circles above the sequence: green, K<sup>+</sup> coordinating residues; violet, Cl<sup>-</sup> coordinating residues; gray, Na<sup>+</sup> coordinating residues in NKCC1; yellow, disulfide bond forming residues; brown, glycosylated residues; and cyan, extracellular gate forming residues. (B) Cladogram of CCC family made using sequences from mouse. (C) Percentage sequence identity between members of the mouse CCC family.

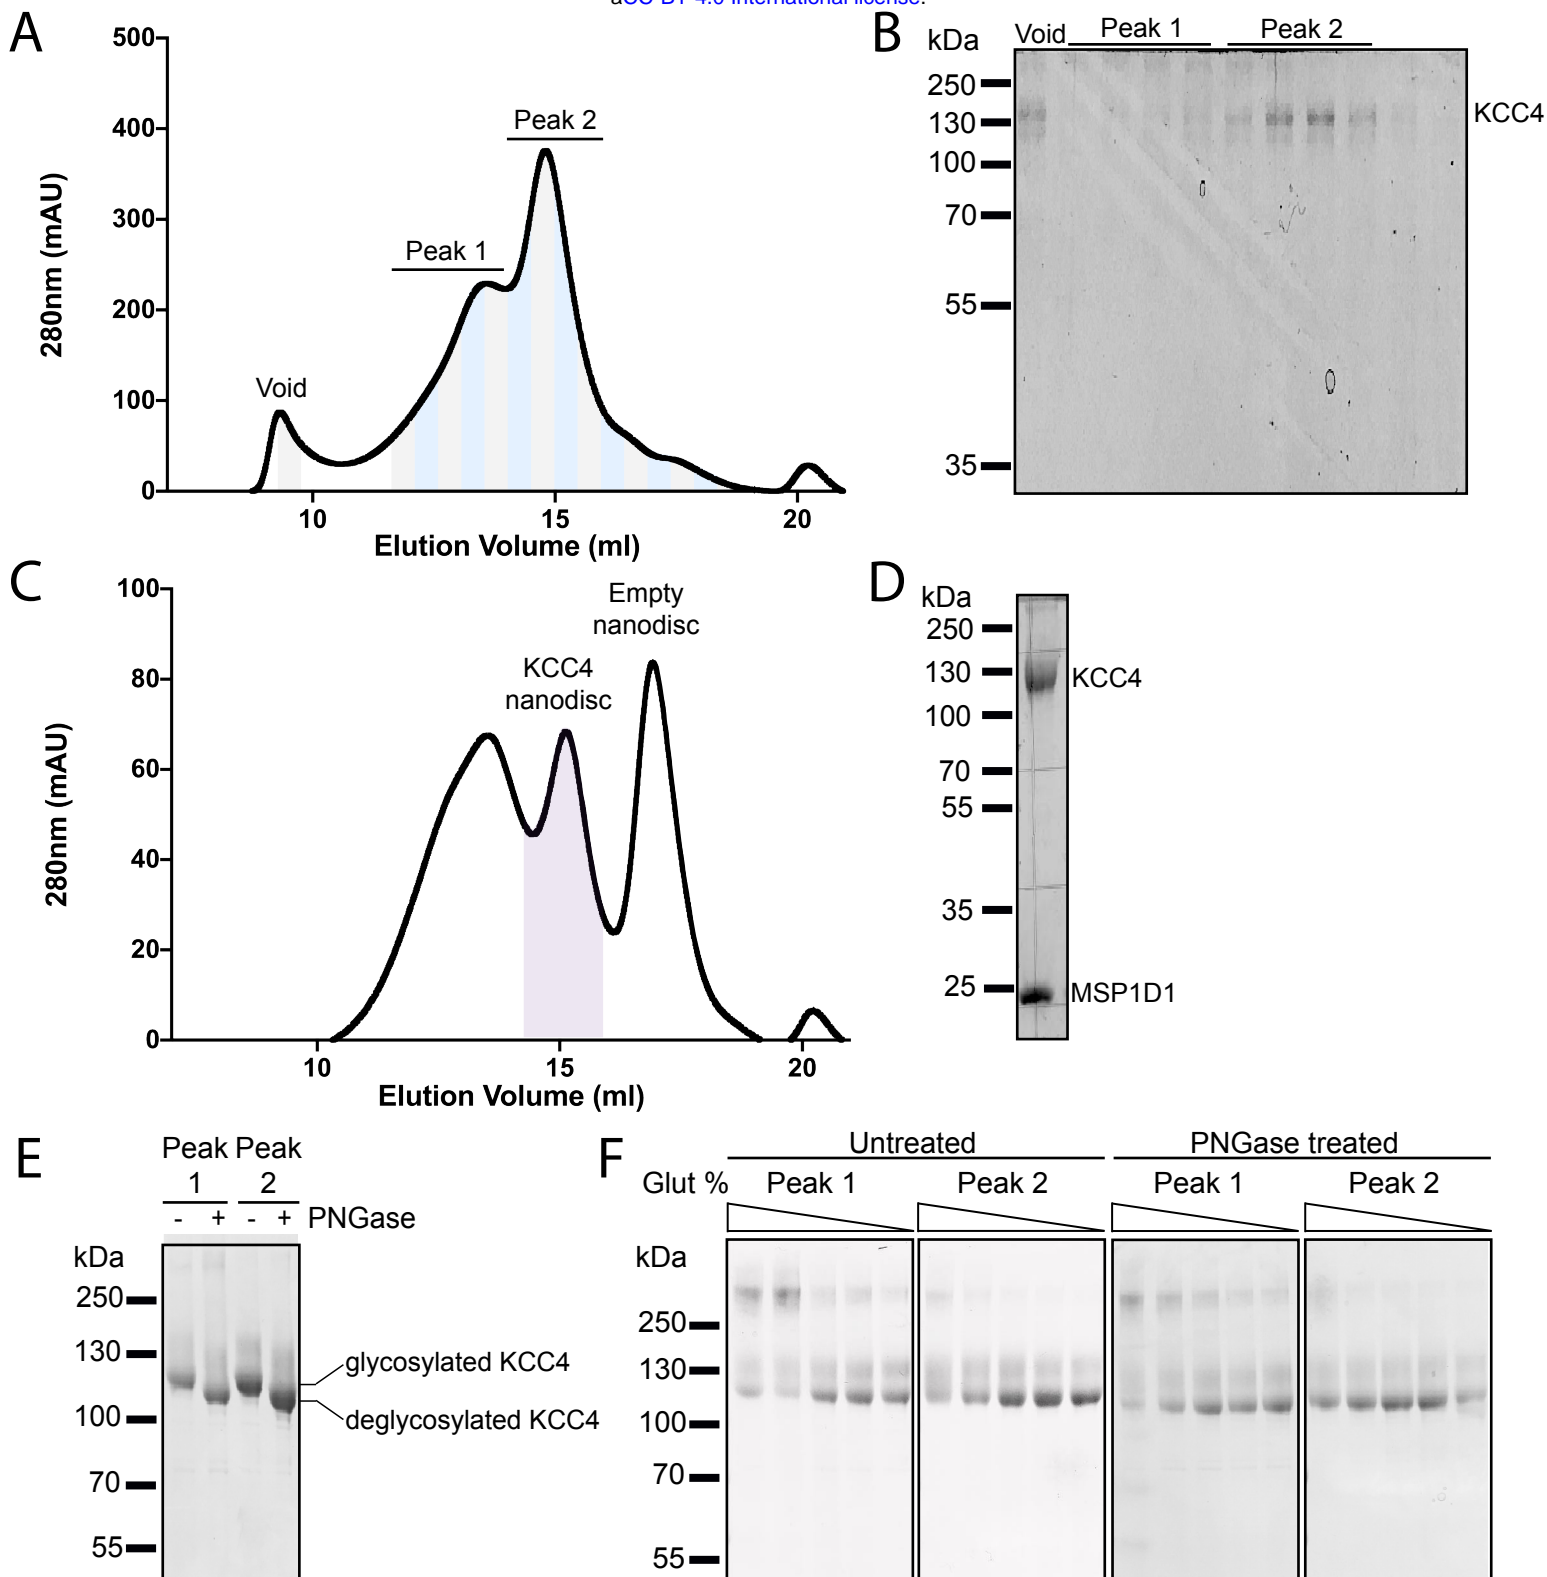

### Supplemental Figure 2 – Purification and reconstitution of mouse KCC4

(A) Representative chromatogram from a Superose 6 gel filtration of KCC4 purified in DDM/CHS. (B) Coomassie-stained SDS-PAGE fractions (indicated by alternating gray and blue bands in (A)) with band corresponding to KCC4 labeled. KCC4 is present in two species: an earlier eluting, broader peak 1 and a later eluting, sharper peak 2. Fractions in the later eluting peak correspond to monodisperse KCC4 and were used for structure determination. (C) Representative chromatogram from Superose 6 gel filtration of KCC4 reconstituted in MSP1D1 lipid nanodiscs. (D) Coomassie-stained SDS-PAGE of final pooled KCC4-MSP1D1 nanodisc sample (indicated by purple shading in (C)). (E) Coomassie-stained SDS-PAGE of peak 1 and peak 2 pools (as indicated in (A,B)) before (-) and after (+) treatment with PNGase. (F) Coomassie-stained SDS-PAGE of KCC4 crosslinked with different concentrations of glutaraldehyde (bands within each gel correspond to 0.02, 0.01, 0.005, 0.0025, and 0% glutaraldehyde, respectively). Peak 1 and peak 2 samples were pooled as indicated in (A,B), concentrated, and crosslinked (left pair of gels) or deglycosylated with PNGase prior to crosslinking (right pair of gels).

Figure S3

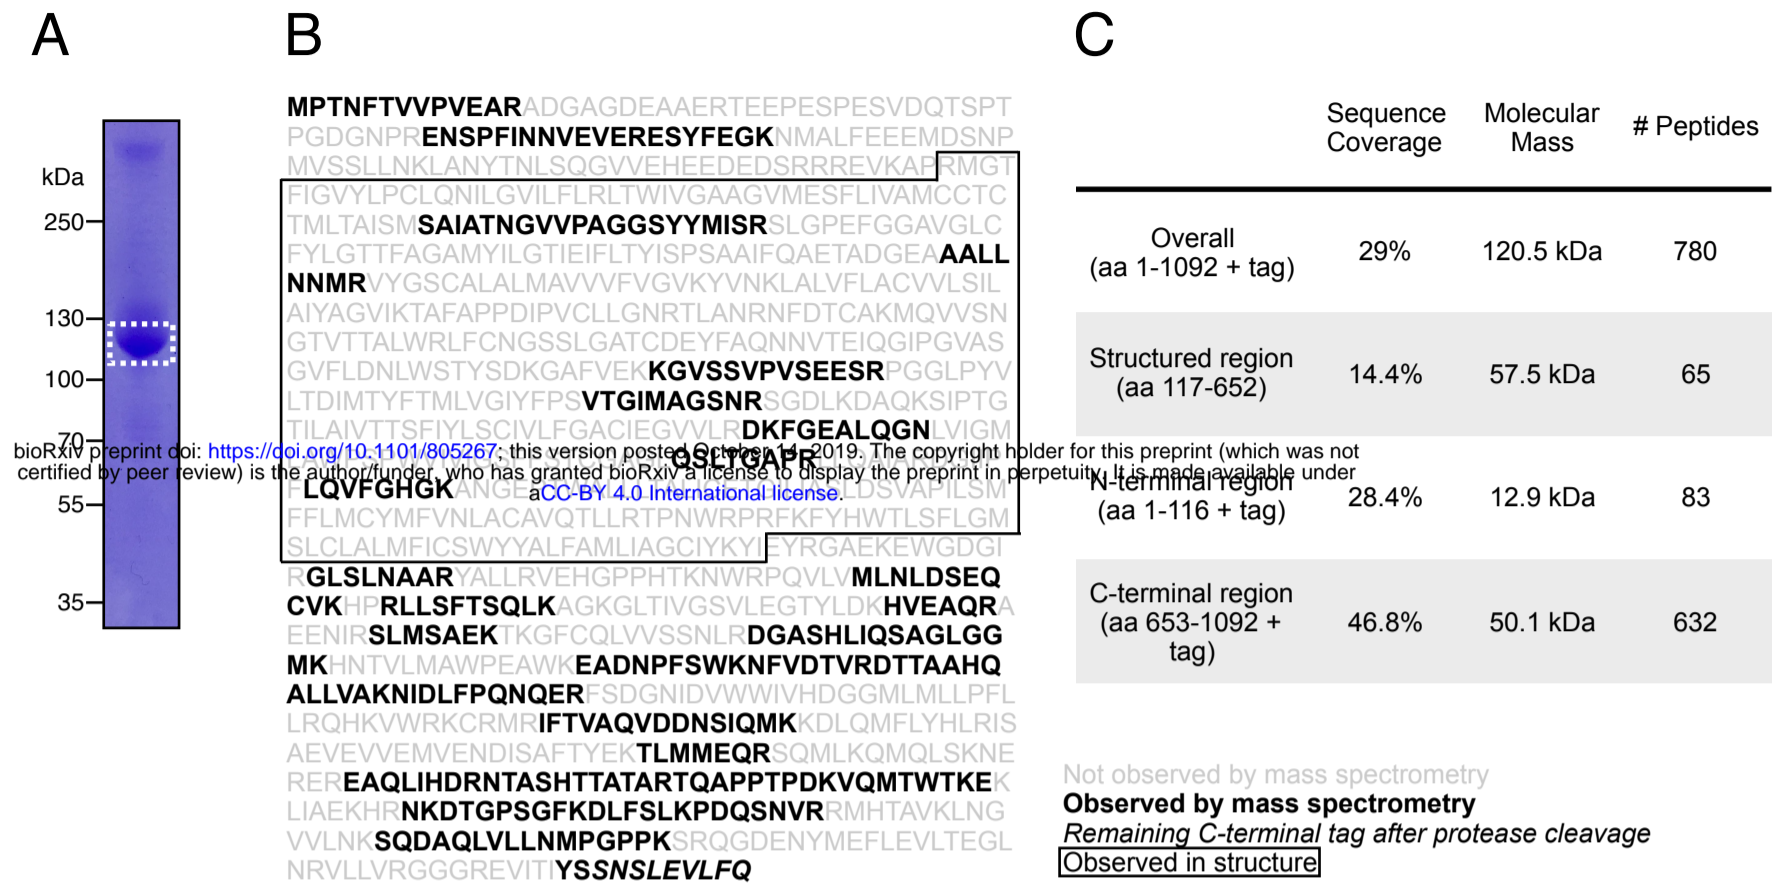

**Supplemental Figure 3 – Mass spectrometry of purified KCC4**

(A) Coomassie-stained SDS-PAGE of purified mouse KCC4 sample used for mass spectrometry. The band indicated by dashed lines was excised for analysis. (B) Identified peptides (bold) are indicated on the purified KCC4 sequence. Boxed region indicates boundaries of KCC4 observed by cryo-EM. (C) Summary of mass spectrometry data.

## Figure S4

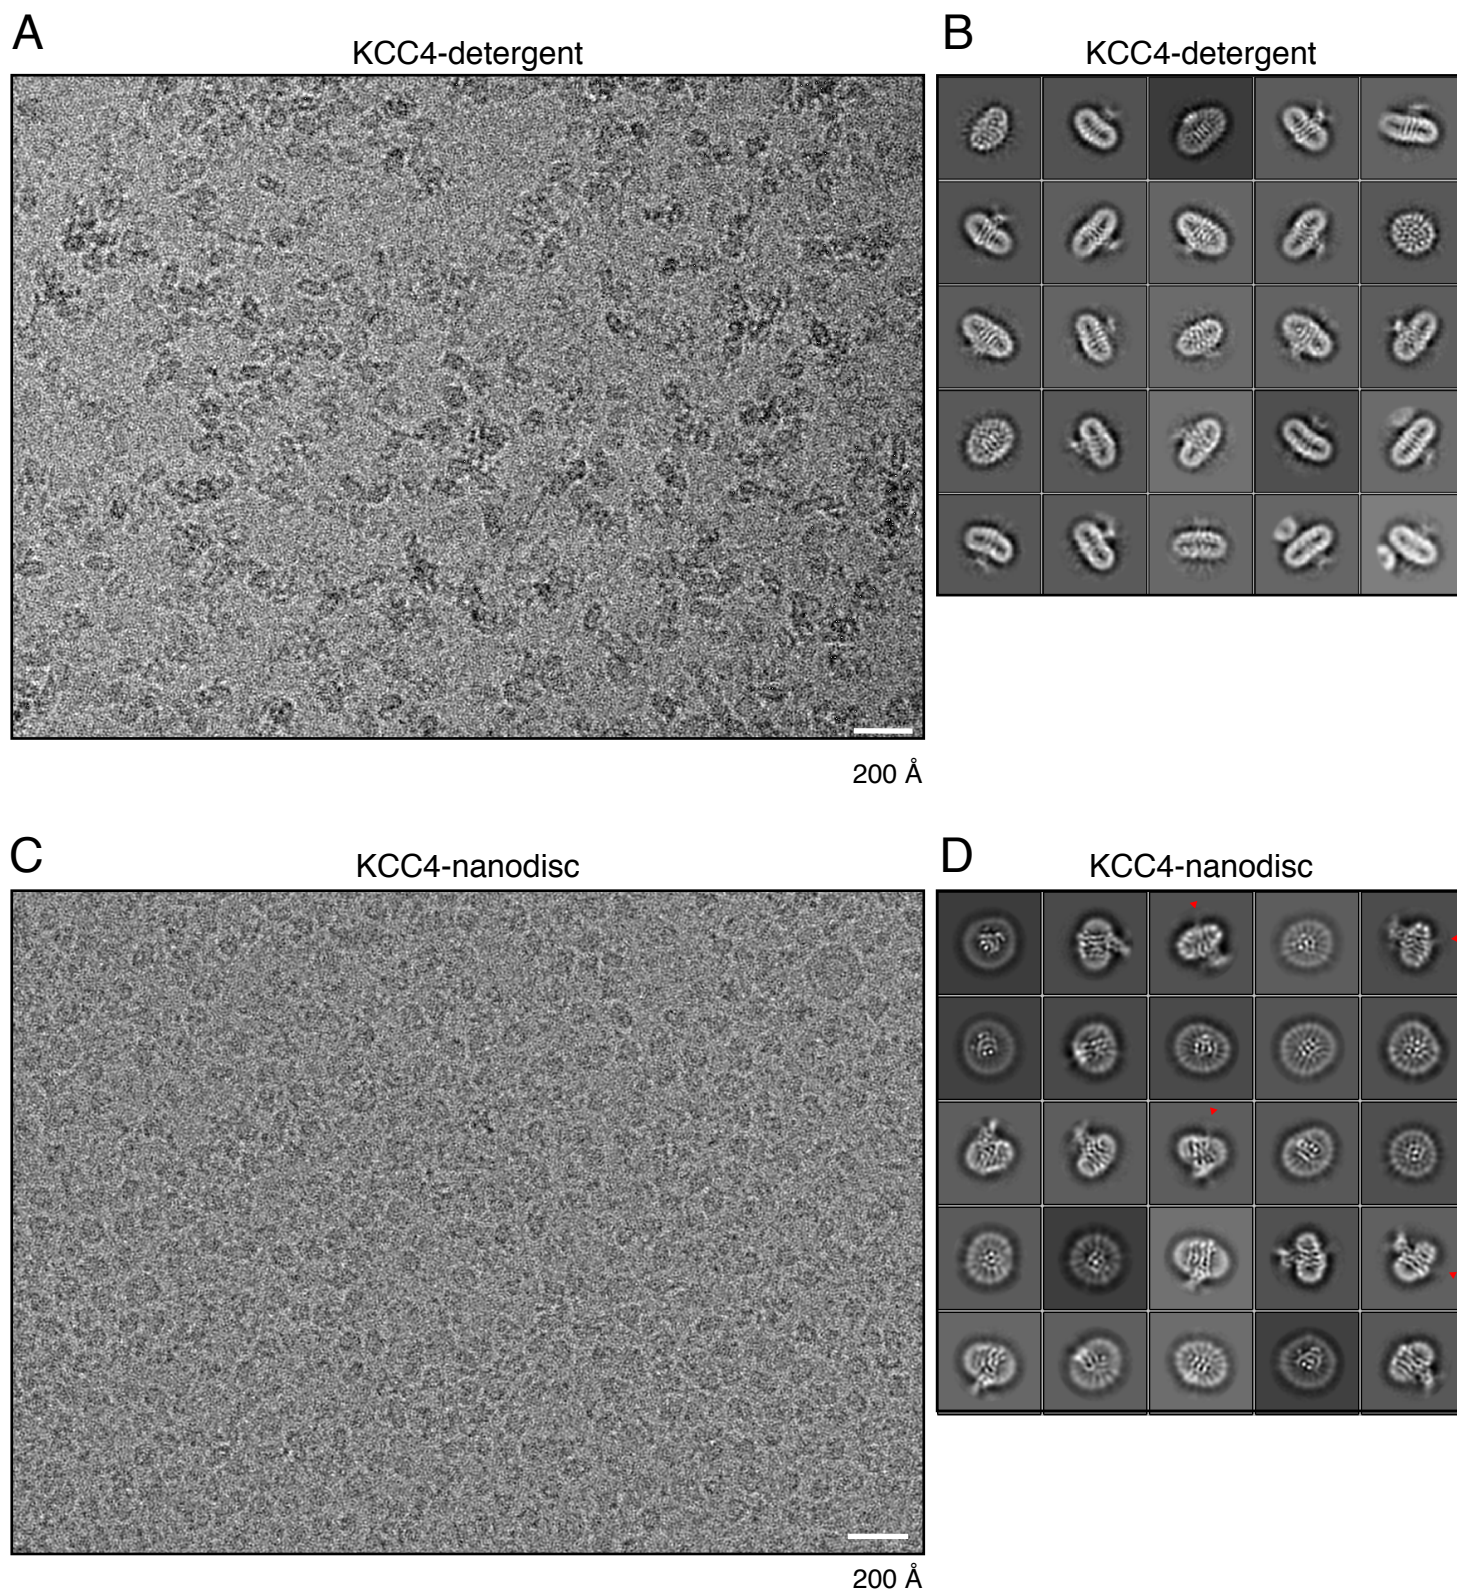

### Supplemental Figure 4 – Example micrograph and 2D class averages

(A) Representative micrograph and (B) selected class averages of KCC4 in detergent (DDM/CHS) micelles. (C) Representative micrograph and (D) selected class averages of KCC4 in MSP1D1 lipid nanodiscs. Red arrowheads in (D) point to blurred density features on the intracellular side of the membrane consistent with flexible N-terminal regions or CTDs.

## Figure S5

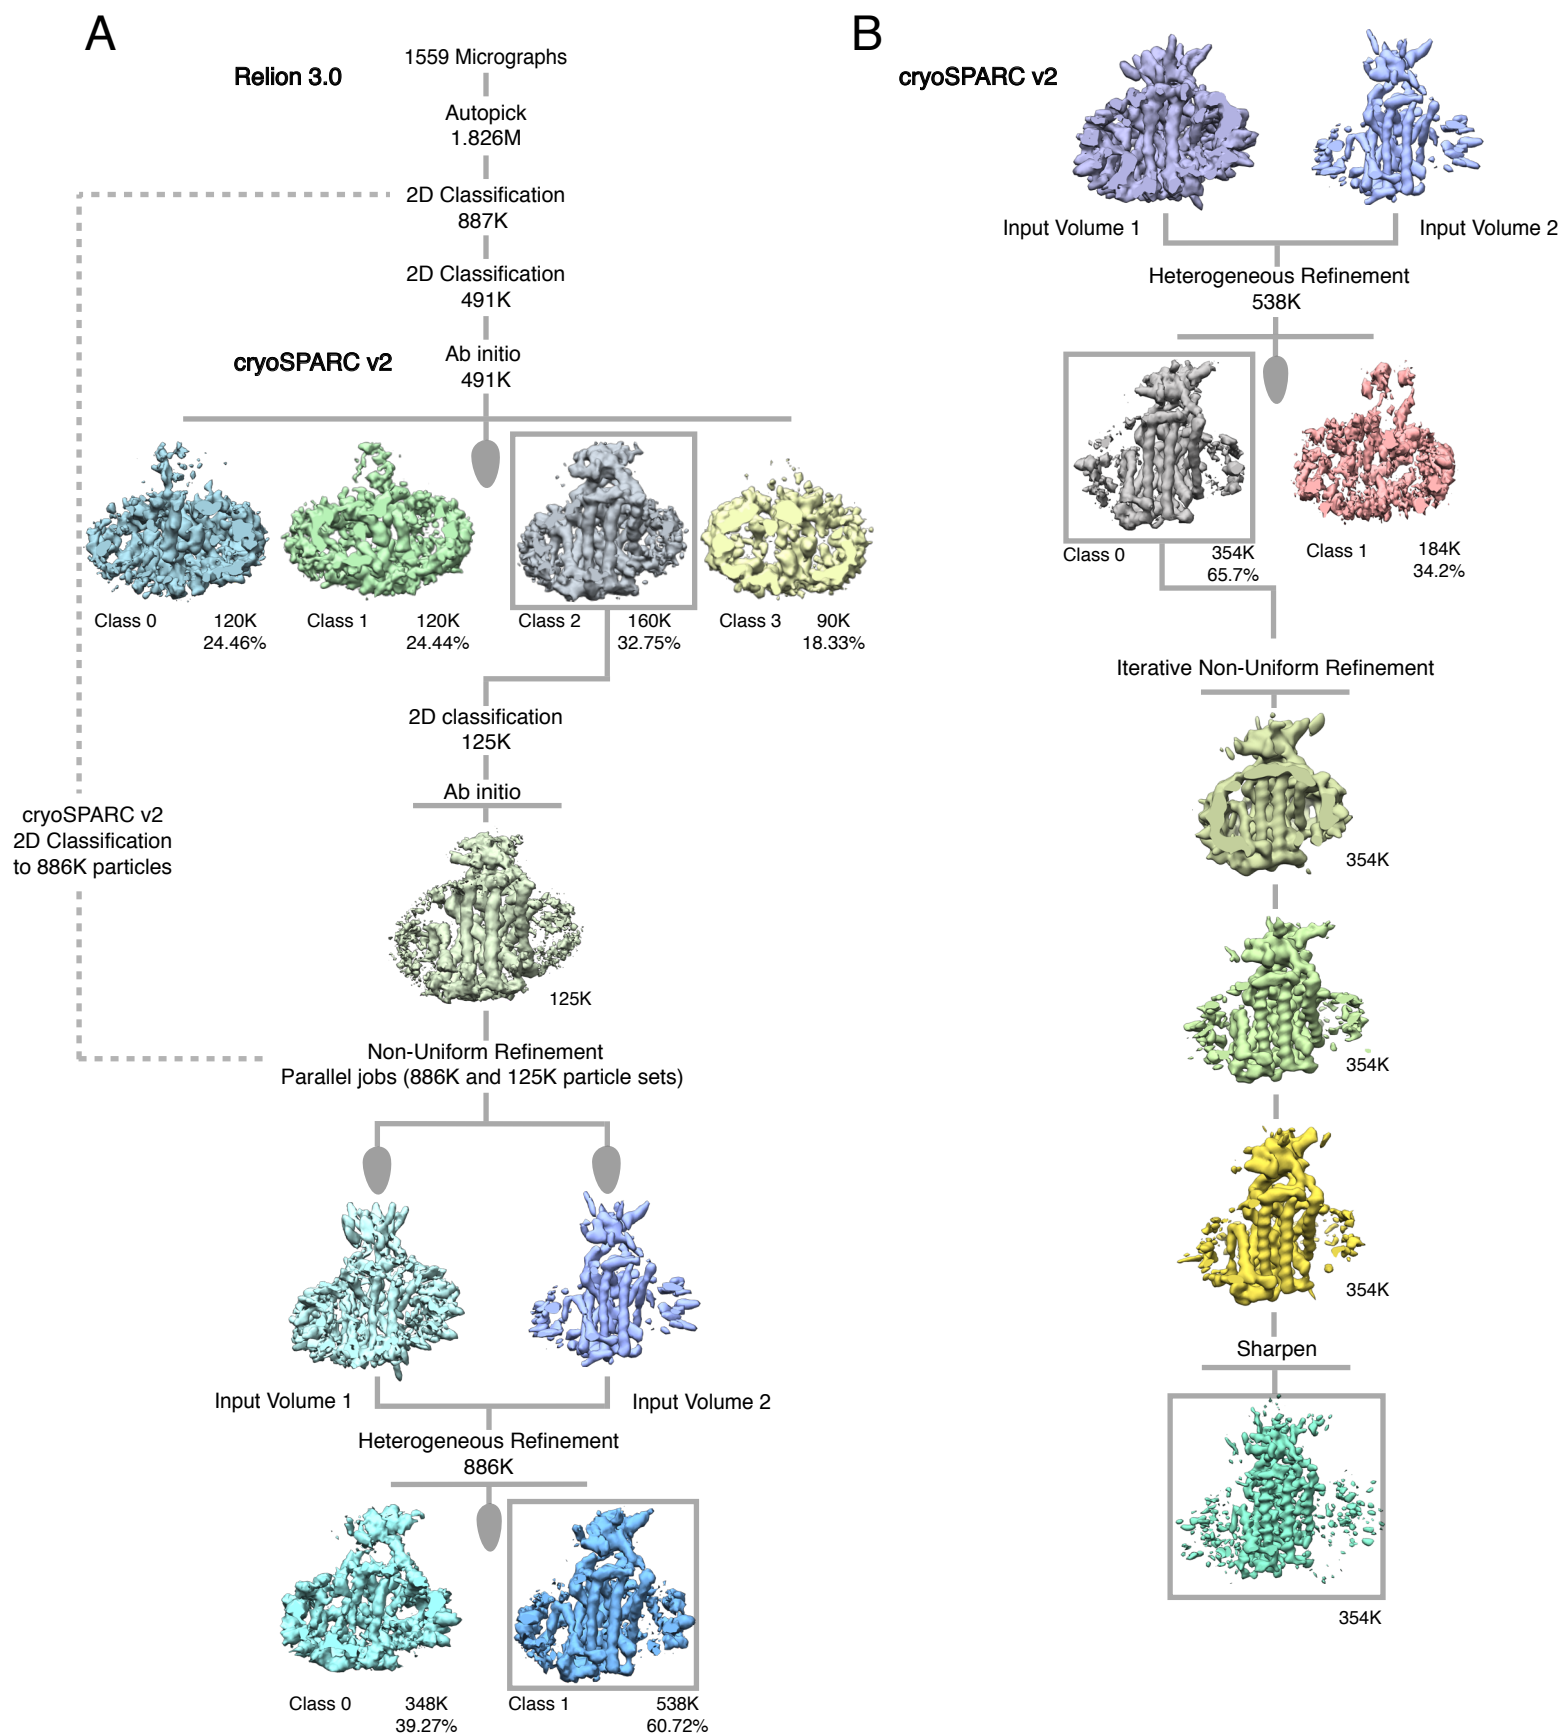



C

Import from particles from cryoSPARC2 NU Refinement

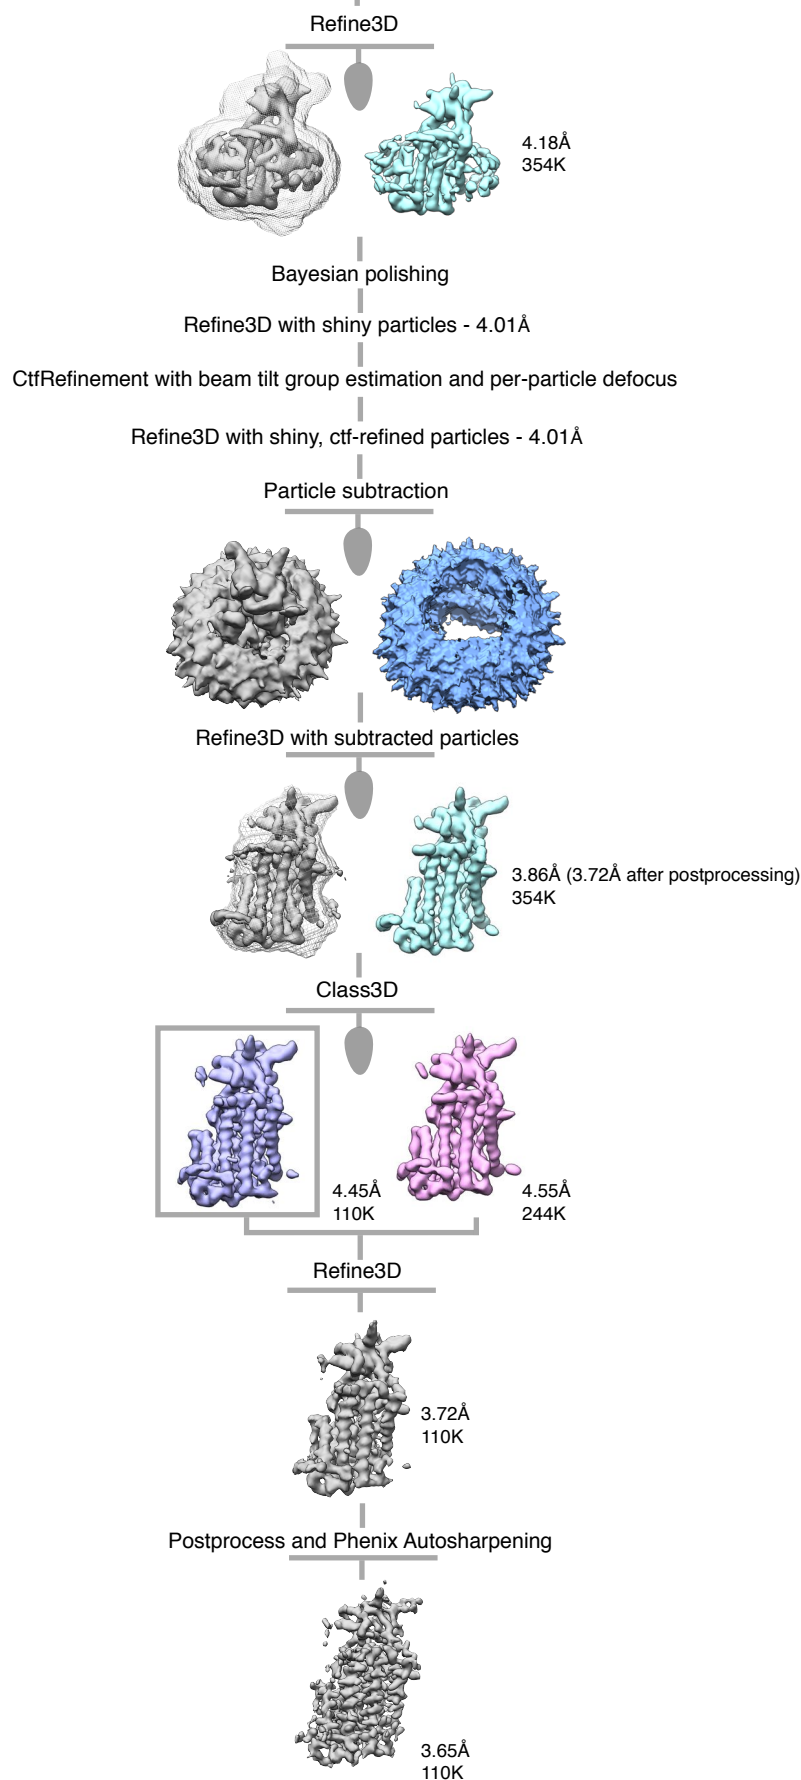

**Supplemental Figure 5 – Cryo-EM processing pipeline for KCC4 in MSP1D1 nanodiscs**

(A,B) Initial stages of cryo-EM data processing in Relion and cryoSPARC2. (C) Final stages of cryo-EM data processing in Relion. See Methods for details

## Figure S6

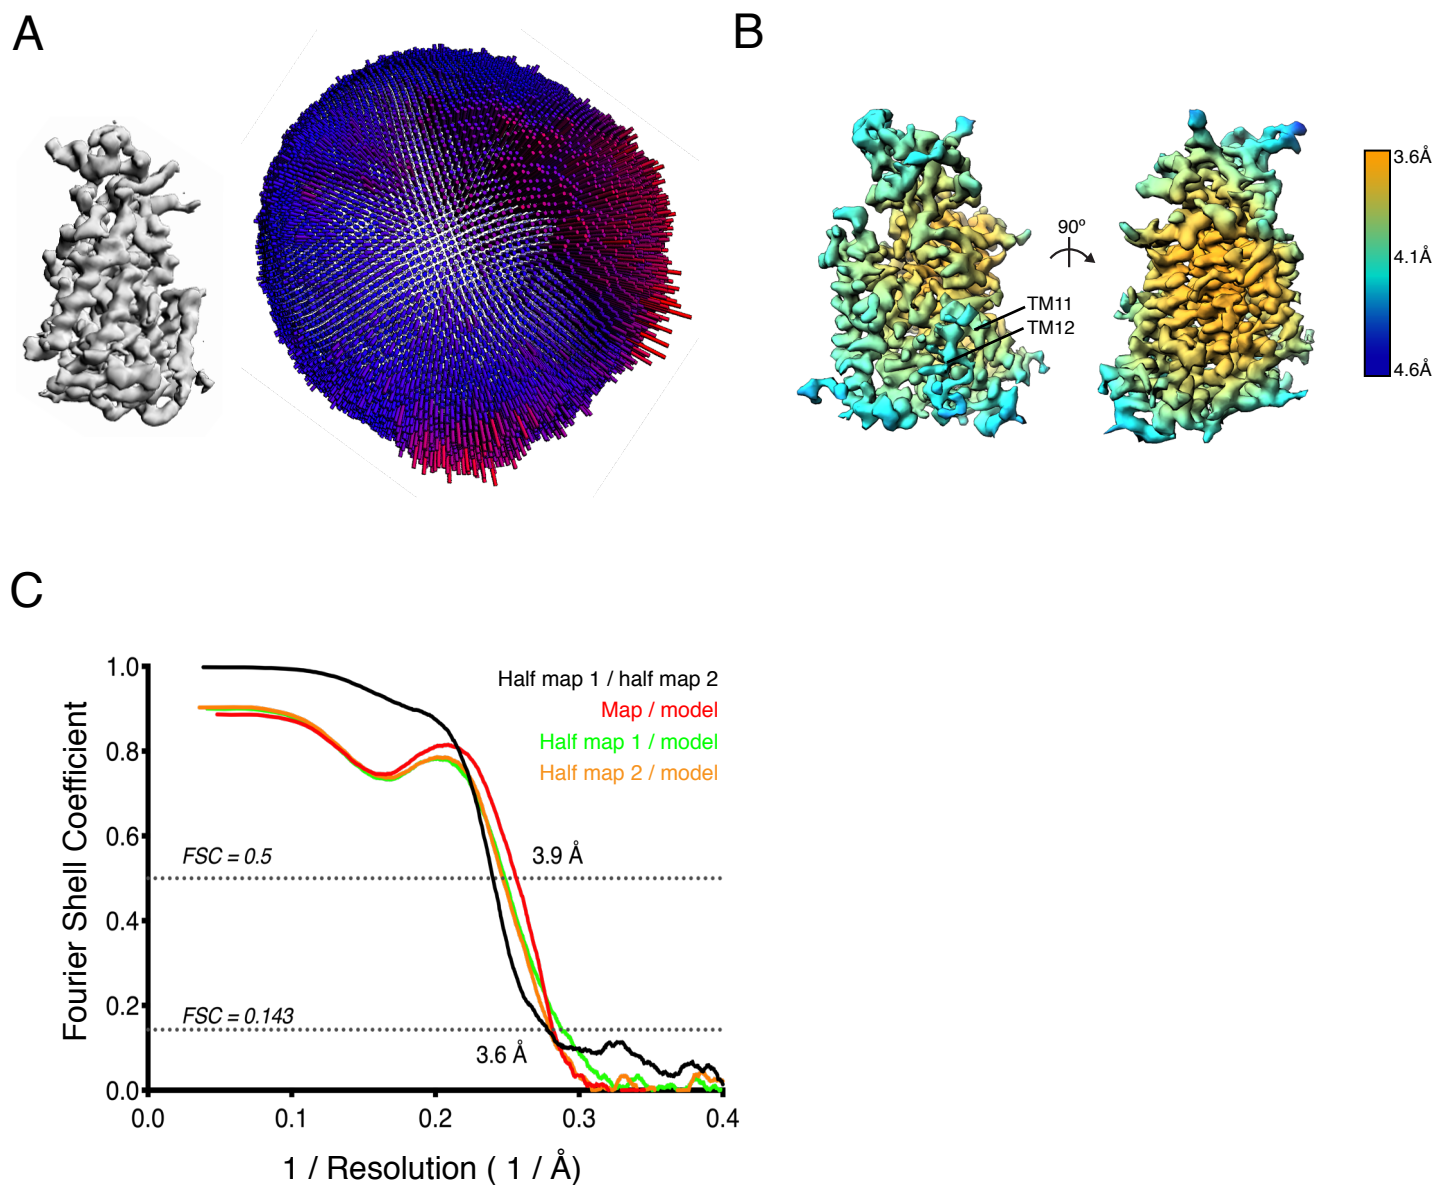

### Supplemental Figure 6 – Cryo-EM validation

(A) Angular distribution of particles used in final refinement with final map for reference. (B) Local resolution estimated in Relion colored as indicated on the final map. (Right) a view from the membrane plane showing relatively weaker local resolution in TM11-12 and (left) a view rotated 90°. (C) Fourier Shell Correlation (FSC) relationships between (black) the two unfiltered half-maps from refinement and used for calculating overall resolution at 0.143, (red) final map versus model, (orange) half-map one versus model, and (green) half-map two versus model.

## Figure S7

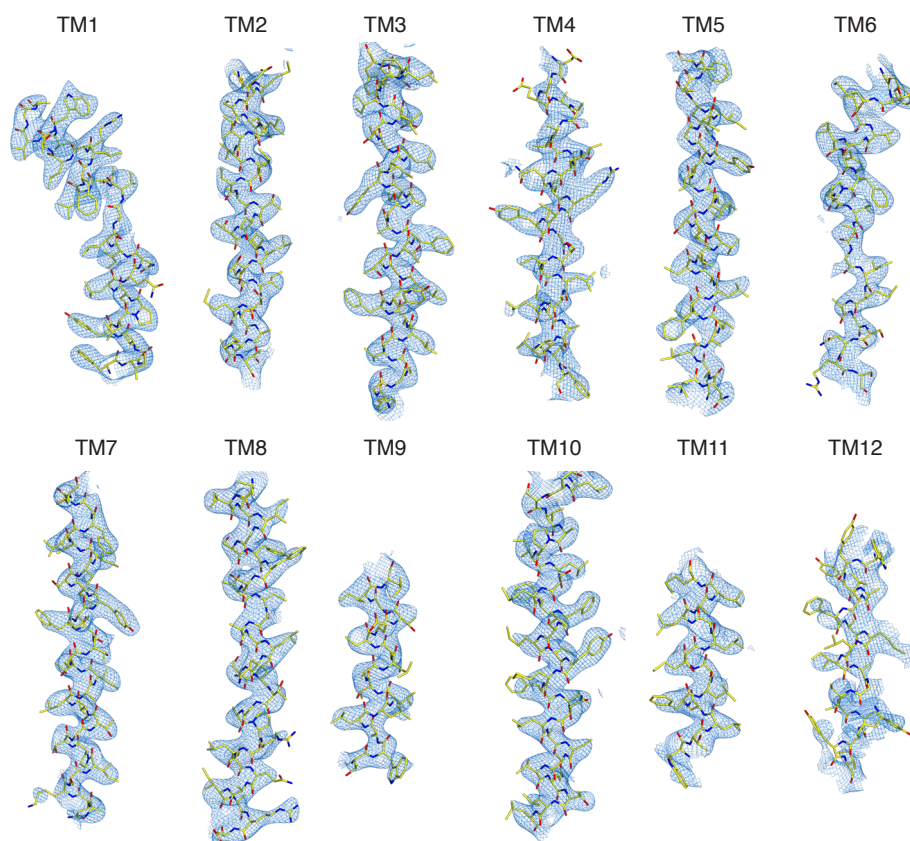

### Supplemental Figure 7 – Representative regions of cryo-EM map

Cryo-EM density is shown carved around each transmembrane helix with the atomic model of KCC4 drawn as sticks.

## KCC4-MSP1D1

### Data collection

|                                                     |              |
|-----------------------------------------------------|--------------|
| Total movie #                                       | 1573         |
| Selected movie #                                    | 1401         |
| Magnification                                       | 36,000x      |
| Voltage (kV)                                        | 200          |
| Electron exposure (e <sup>-</sup> /Å <sup>2</sup> ) | 46.665       |
| Frame #                                             | 50           |
| Defocus range (μm)                                  | -0.7 to -2.5 |
| Super resolution pixel size (Å)                     | 0.5685       |
| Binned pixel size (Å)                               | 1.137        |

### Processing

|                                       |           |
|---------------------------------------|-----------|
| Initial particle images (no.)         | 887,132   |
| Final particle images (no.)           | 110,143   |
| Map resolution                        |           |
| Masked (Å, FSC = 0.143 / FSC = 0.5)   | 3.6 / 4.2 |
| Unmasked (Å, FSC = 0.143 / FSC = 0.5) | 3.9 / 4.4 |

### Refinement

|                                                  |           |
|--------------------------------------------------|-----------|
| Model resolution (Å, FSC = 0.143 / FSC = 0.5)    | 3.5 / 3.9 |
| Map-sharpening <i>B</i> factor (Å <sup>2</sup> ) | -150      |
| Composition                                      |           |
| Number of atoms                                  | 4103      |
| Number of protein residues                       | 536       |
| Ligands total                                    | 4         |
| K+                                               | 1         |
| Cl-                                              | 1         |
| NAG-NAG-BMA                                      | 2         |
| R.m.s. deviations                                |           |
| Bond lengths (Å)                                 | 0.005     |
| Bond angles (°)                                  | 0.731     |
| Validation                                       |           |
| MolProbity score                                 | 1.7       |
| Clashscore                                       | 4.59      |
| EMRinger score                                   | 1.74      |
| Ramachandran plot                                |           |
| Favored (%)                                      | 92.48     |
| Allowed (%)                                      | 7.52      |
| Disallowed (%)                                   | 0         |
| Rotamer outliers (%)                             | 0.23      |
| Mean <i>B</i> factors (Å <sup>2</sup> )          |           |
| Protein                                          | 75.41     |
| Ligand                                           | 106.62    |
